# Supplementary material for: Maf and Mafb control mouse pallial interneuron fate and maturation through neuropsychiatric disease gene regulation
Source: eLife journal article supplement (doi:10.7554/elife.54903), 2020-05-26
Supplement: supp [file elife-54903-supp-v1.zip]

Archive with 17 entries (17 files):
- elife_poa_e54903_Figure_1_figure_supplement_1.pdf
- elife_poa_e54903_Figure_1_figure_supplement_2.pdf
- elife_poa_e54903_Figure_1_figure_supplement_3.pdf
- elife_poa_e54903_Figure_1_figure_supplement_4.pdf
- elife_poa_e54903_Figure_1_figure_supplement_5.pdf
- elife_poa_e54903_Figure_1_figure_supplement_6.pdf
- elife_poa_e54903_Figure_1_figure_supplement_7.pdf
- elife_poa_e54903_Figure_1_source_data_1.xlsx
- elife_poa_e54903_Figure_2_figure_supplement_1.pdf
- elife_poa_e54903_Figure_3_figure_supplement_1.pdf
- elife_poa_e54903_Figure_3_figure_supplement_2.pdf
- elife_poa_e54903_Figure_3_figure_supplement_3.pdf
- elife_poa_e54903_Figure_4_figure_supplement_1.pdf
- elife_poa_e54903_Figure_4_figure_supplement_2.pdf
- elife_poa_e54903_Figure_5_figure_supplement_1.pdf
- elife_poa_e54903_Figure_6_figure_supplement_1.pdf
- elife_poa_e54903_Transparent_Reporting_File.docx
