# Supplementary material for: Maf and Mafb control mouse pallial interneuron fate and maturation through neuropsychiatric disease gene regulation
Source: eLife journal article supplement (doi:10.7554/elife.54903), 2020-05-26
Supplement: supp [file elife-54903-supp-v1.zip › elife_poa_e54903_Figure_1_figure_supplement_1.pdf]

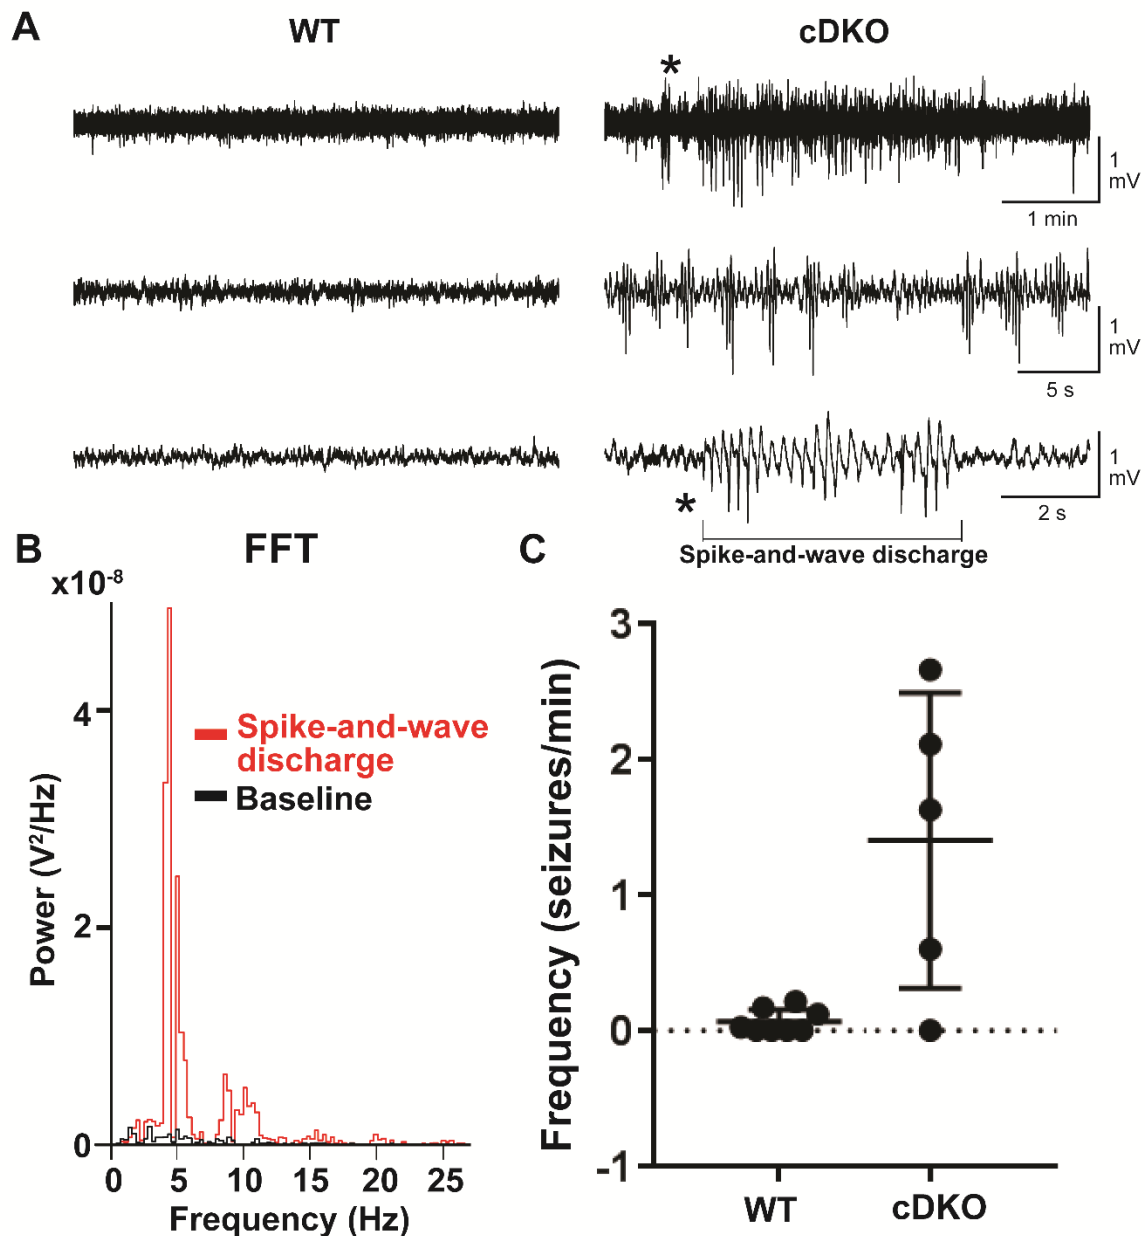

**Figure 1 – figure supplement 1. Adult *Maf* cDKO animals have spontaneous non-motor seizure activities**

(A) Representative EEG recordings from freely behaving WT and *Maf* cDKO mice. Note the presence of epileptic discharges in the cDKO but not the WT mouse. The epileptic episode indicated by the asterisk was expanded in the bottom trace to illustrate the spike-and-wave discharge characteristic of typical absence type seizures. (B) Fast-Fourier transform of the spike-and-wave discharge (red) illustrated in panel (A), and the preceding baseline EEG activity (black). (C) Quantification of the frequency of epileptiform events in freely behaving WT (n=7 mice) and cDKO (n=5 mice) mice
