# Supplementary material for: Maf and Mafb control mouse pallial interneuron fate and maturation through neuropsychiatric disease gene regulation
Source: eLife journal article supplement (doi:10.7554/elife.54903), 2020-05-26
Supplement: supp [file elife-54903-supp-v1.zip › elife_poa_e54903_Figure_1_figure_supplement_2.pdf]

## Top 10 marker genes for each cluster

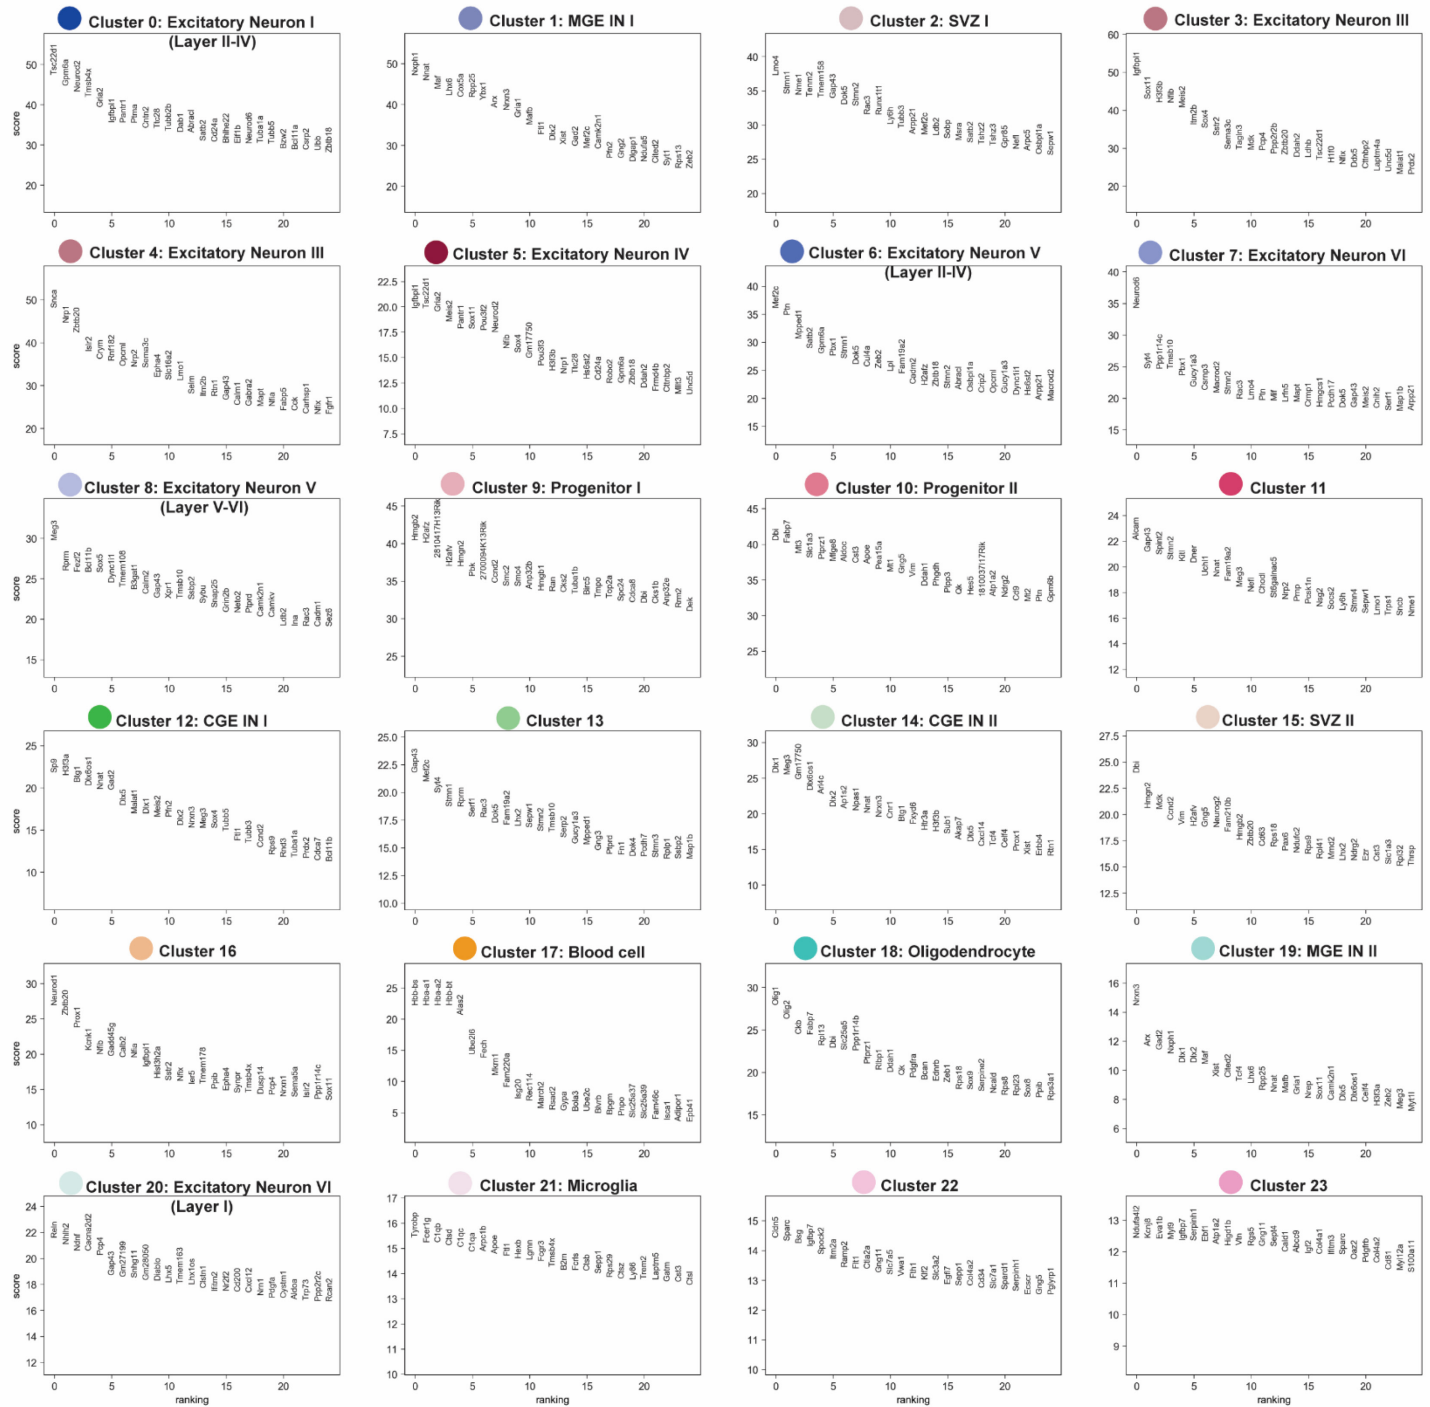

**Figure 1 – figure supplement 2. Top 10 ranked marker genes for each cluster**

Each panel shows the cluster number, each cluster's corresponding color that matched the cluster localization in Fig. 1B, and each cluster's top 10 ranked marker genes.
