# Supplementary material for: Maf and Mafb control mouse pallial interneuron fate and maturation through neuropsychiatric disease gene regulation
Source: eLife journal article supplement (doi:10.7554/elife.54903), 2020-05-26
Supplement: supp [file elife-54903-supp-v1.zip › elife_poa_e54903_Figure_1_figure_supplement_5.pdf]

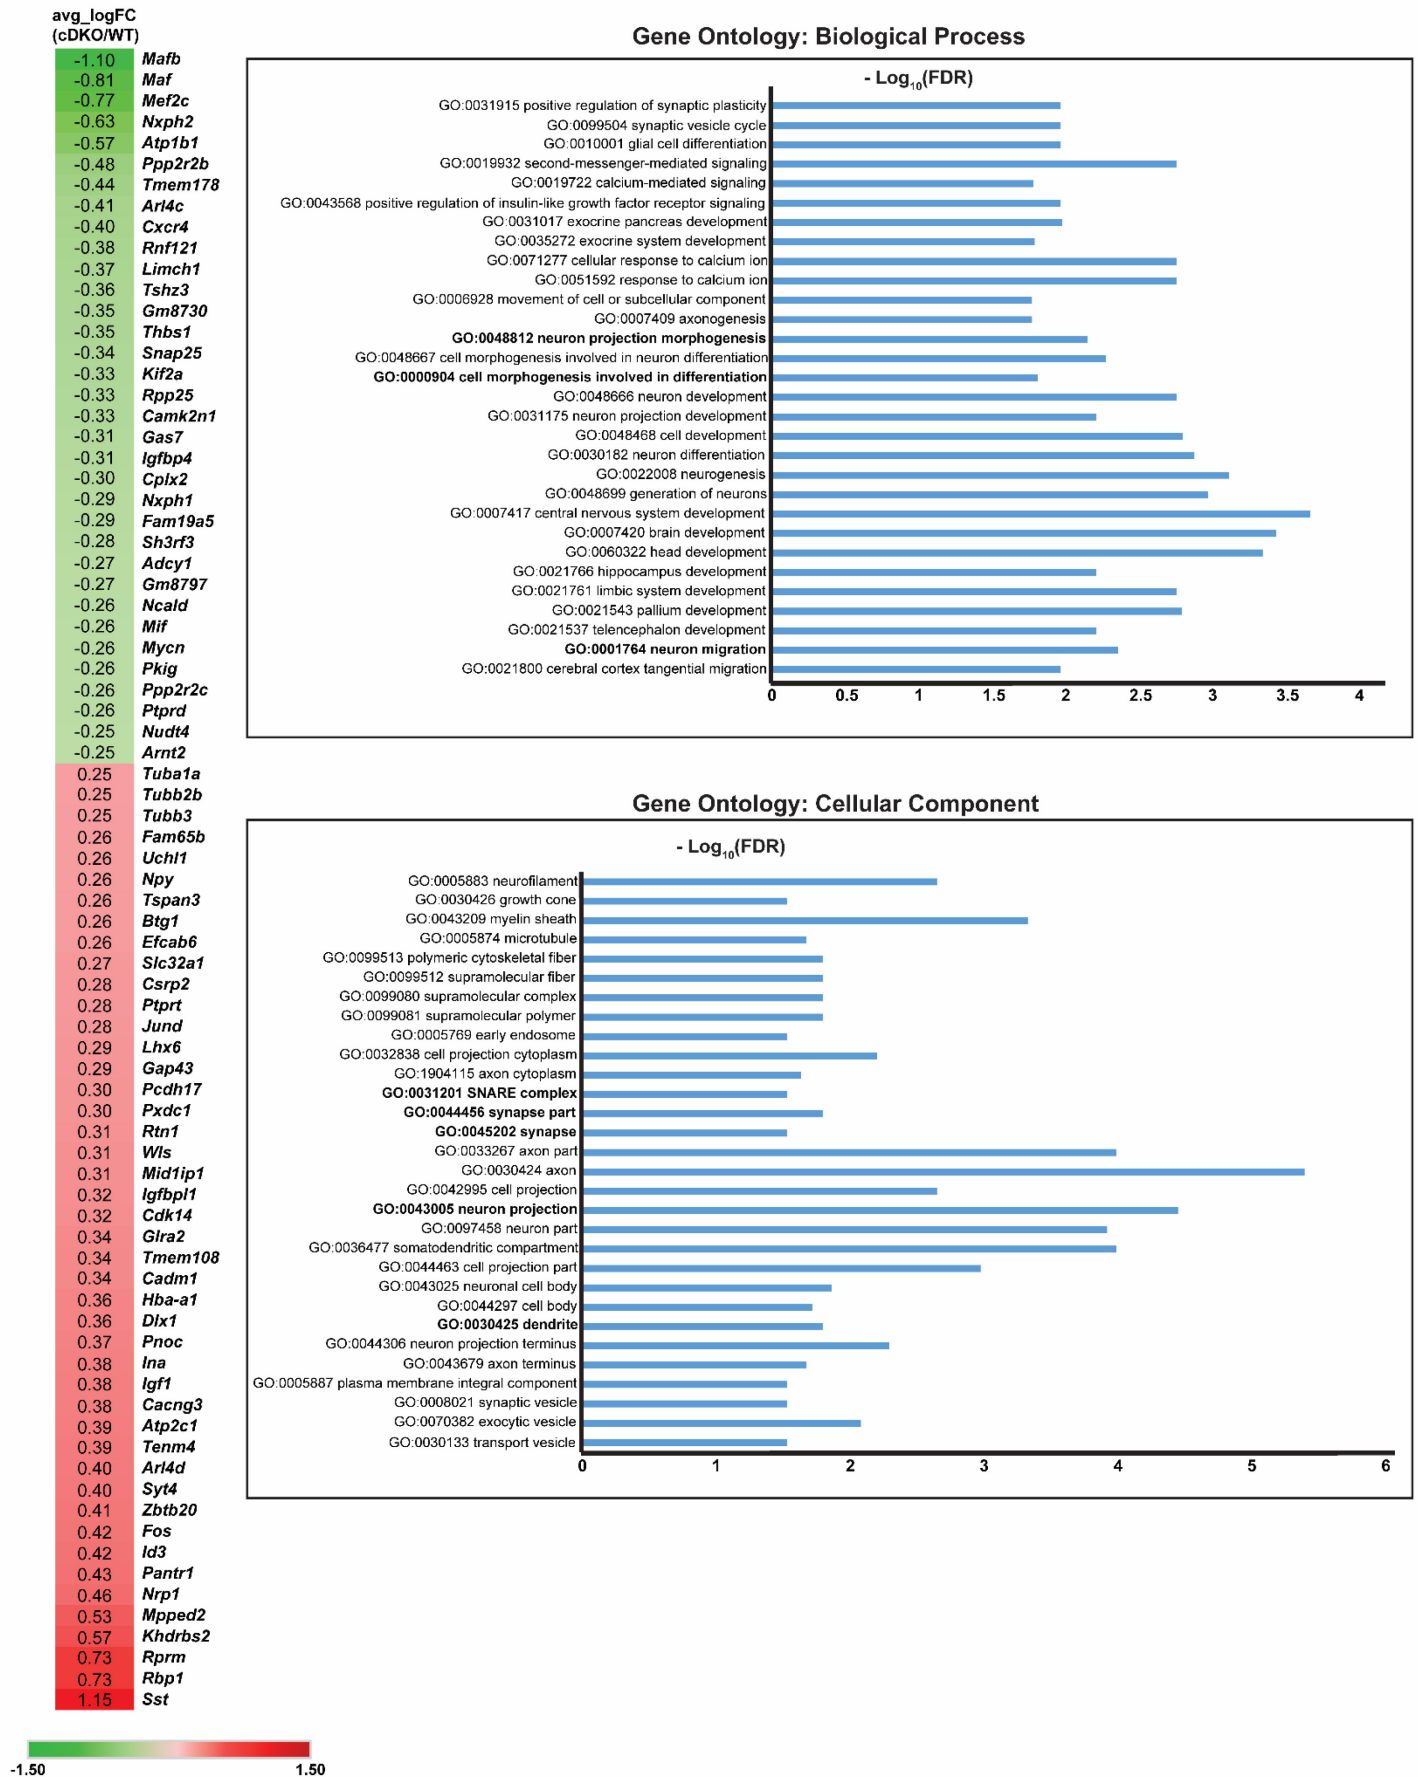

Figure 1 – figure supplement 5. DEX gene list and Gene Ontology analysis on DEX genes

Heatmap showing the DEX gene list of the MGE IN population (cluster 1) when compared cDKO to WT. (Left) Numbers listed corresponds to Log (FoldChange) values. Green color represents genes downregulated in the *Maf* cDKO, while red color represents genes upregulated in the *Maf* cDKO. (Right) Gene ontology analysis of the DEX genes based upon biological processes and cellular components.
