# Supplementary material for: Maf and Mafb control mouse pallial interneuron fate and maturation through neuropsychiatric disease gene regulation
Source: eLife journal article supplement (doi:10.7554/elife.54903), 2020-05-26
Supplement: supp [file elife-54903-supp-v1.zip › elife_poa_e54903_Figure_1_figure_supplement_6.pdf]

(A-B) double FISH of *tdTomato* and *Cxcr4* on P2 WT (A) and cDKO (B) hippocampus. (C-H) Higher magnification images from WT and cDKO that show *tdTomato* and *Cxcr4* expression in CA1 (C,F), CA3 (D,G) and DG (E, H). (I) Quantification of the *tdTomato*<sup>+</sup>;*Cxcr4*<sup>+</sup> IN cell density in the neocortex. (J) Quantification of the *tdTomato*<sup>+</sup>;*Cxcr4*<sup>+</sup> IN cell density in the hippocampus. (K) Quantification of the *tdTomato*<sup>+</sup>;*Cxcr4*<sup>+</sup> HIN cell

density by hippocampal regions. (L-O) double FISH of *Lhx6* and *Cxcr4* on E15.5 WT (L, N) and cDKO (M, O) hemispheres and higher magnification in neocortex. Arrows point to the *Lhx6*<sup>+</sup> CINs that are *Cxcr4*<sup>+</sup>. (P) Quantification of the density of CINs that are *Lhx6* and *Cxcr4* double positive. (Q) Quantification of the proportion of *Lhx6*<sup>+</sup> CINs that are *Cxcr4*<sup>+</sup>. Scale bar in (B) = 300um, (H) and (O) = 100um and (M)=800um. N=3-4 per groups for the P2 experiment and N=2 for the E15.5 experiment. \*p<0.05, \*\* p<0.01, \*\*\*\* p<0.0001. Cell density was compared using Welch's t test while the proportion comparison was done using Mann-Whitney test.
