# Supplementary material for: Maf and Mafb control mouse pallial interneuron fate and maturation through neuropsychiatric disease gene regulation
Source: eLife journal article supplement (doi:10.7554/elife.54903), 2020-05-26
Supplement: supp [file elife-54903-supp-v1.zip › elife_poa_e54903_Figure_1_figure_supplement_7.pdf]

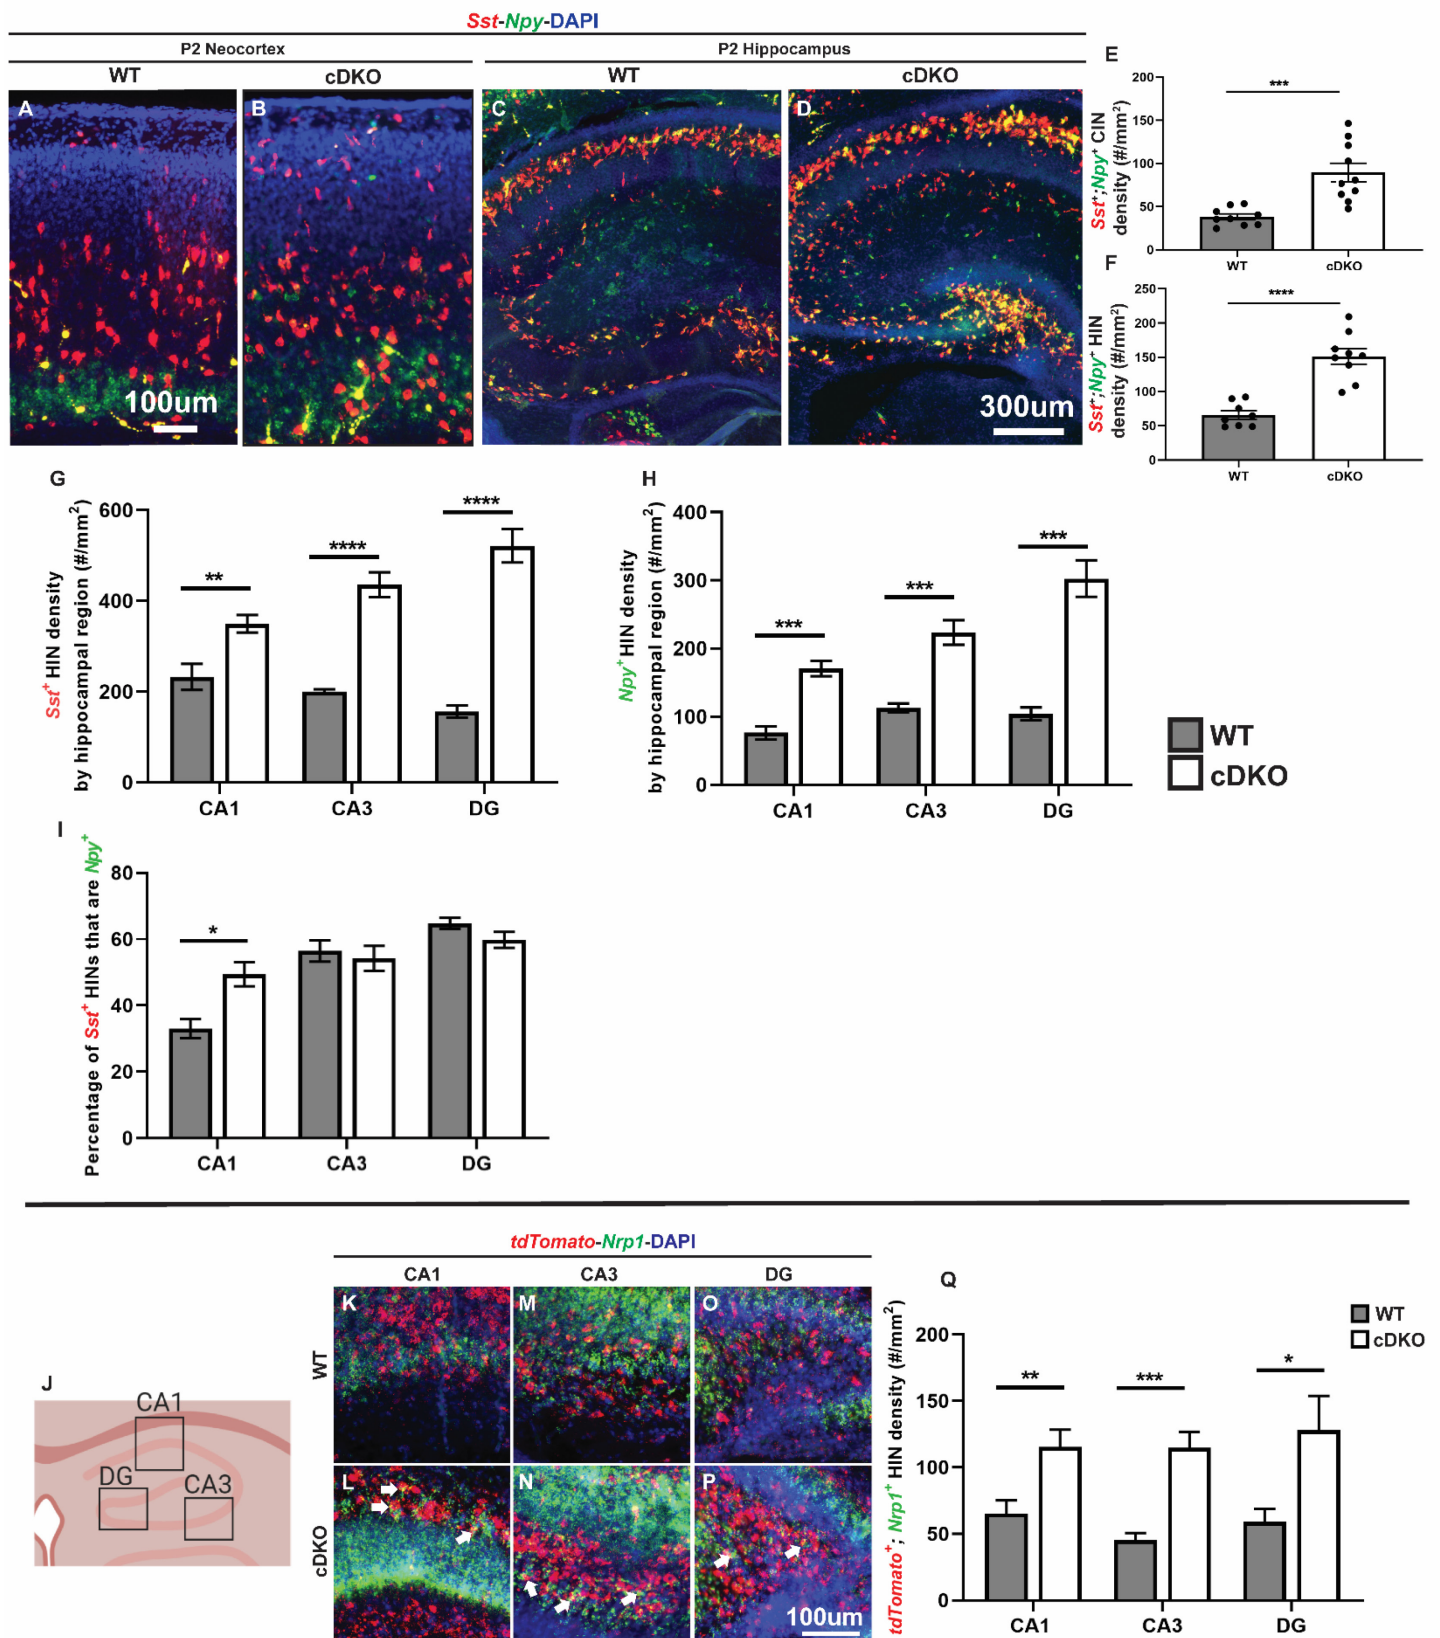

**Figure 1 – figure supplement 7. *Maf* cDKO has increased *Sst*<sup>+</sup>/*Npy*<sup>+</sup>/*Nrp1*<sup>+</sup> expressing HINs**

(A-B) Double FISH of *Sst* and *Npy* on P2 WT (A) and cDKO (B) neocortex. (C-D) Double FISH of *Sst* and *Npy* on P2 WT (C) and cDKO (D) hippocampus. (E-F) Quantification of the *Npy*<sup>+</sup>; *Sst*<sup>+</sup> CIN density (E) and HIN density (F). (G-H) Quantification of the HINs that are either *Sst*<sup>+</sup> or *Npy*<sup>+</sup> by region. (I) Quantification of the percentage of *Sst*<sup>+</sup> HINs that are *Npy*<sup>+</sup> by region. (J) Cartoon schema illustrating the hippocampal regions used for quantification. (K-P) FISH images from P2 WT and cDKO that show *tdTomato* and *Nrp1* expression in CA1

(K, L), CA3 (M, N) and DG (O, P). Arrows point to the *tdTomato*<sup>+</sup> HINs that are *Nrp1*<sup>+</sup>. (Q) Quantification of the *tdTomato*<sup>+</sup>; *Nrp1*<sup>+</sup> IN cell density by hippocampal regions. Note that the HINs in the pyramidal cell layer were excluded from the quantification. Scale bar in (A) and (P) = 100um and (D) = 300um. N=3 per groups per experiment for analysis. \*p<0.05, \*\* p<0.01, \*\*\*p<0.001, \*\*\*\* p<0.0001. Cell density was compared using Welch's t test while the proportion comparison was done using Mann-Whitney test.
