# Supplementary material for: Maf and Mafb control mouse pallial interneuron fate and maturation through neuropsychiatric disease gene regulation
Source: eLife journal article supplement (doi:10.7554/elife.54903), 2020-05-26
Supplement: supp [file elife-54903-supp-v1.zip › elife_poa_e54903_Figure_1_source_data_1.xlsx]

## Sheet: clusters_marker_genes
	0_n_LayerII-IV	0_p	1_n_MGE INs	1_p	2_n_Layer II-IV?	2_p	3_n_SVZI	3_p	4_n_excitatory neuron	4_p	5_n_excitatory neurons	5_p	6_n_LayerII-IV	6_p	7_n_excitatory neurons	7_p	8_n_Layer V-VI	8_p	9_n_progenitors	9_p	10_n_progenitors?	10_p	11_n	11_p	12_n_CGE	12_p	13_n	13_p	14_n_CGE?	14_p	15_n_SVZII	15_p	16_n_SVZI	16_p	17_n_blood	17_p	18_n_Oligodendrocytes	18_p	19_n_MGE	19_p	20_n_LayerI	20_p	21_n_microglia	21_p	22_n_Progenitors	22_p	23_n_progenitors?	23_p
0	Tsc22d1	0	Nxph1	0	Lmo4	1.45768e-305	Igfbpl1	0	Snca	0	Igfbpl1	9.97178e-89	Mef2c	4.39209e-288	Neurod6	1.76343e-259	Meg3	1.44652e-195	Hmgb2	0	Dbi	0	Alcam	2.37269e-108	Sp9	5.90824e-106	Gap43	1.43939e-105	Dlx1	3.63026e-147	Dbi	1.29087e-127	Neurod1	1.08071e-160	Hbb-bs	2.95462e-110	Olig1	4.15399e-172	Nrxn3	1.01632e-47	Reln	9.24242e-104	Tyrobp	8.30414e-54	Cldn5	2.58221e-47	Ndufa4l2	1.21192e-35
1	Gpm6a	0	Nnat	0	Stmn1	7.73048e-263	Sox11	0	Nrp1	0	Tsc22d1	6.23935e-88	Ptn	1.18438e-267	Syt4	1.86445e-135	Rprm	3.6109e-150	H2afz	0	Fabp7	0	Gap43	1.02787e-99	H3f3a	4.06665e-103	Mef2c	2.63728e-98	Meg3	1.46321e-144	Hmgn2	6.92803e-95	Zbtb20	2.53732e-144	Hba-a1	3.0172e-110	Olig2	4.99014e-153	Arx	1.43178e-31	Nhlh2	2.79273e-99	Fcer1g	1.30838e-52	Sparc	1.22657e-46	Kcnj8	1.23607e-35
2	Neurod2	0	Maf	0	Nme1	4.94579e-261	H3f3b	0	Zbtb20	0	Gria2	1.70802e-85	Mpped1	7.82601e-208	Ppp1r14c	4.3219e-135	Fezf2	1.42661e-148	2810417H13Rik	0	Mt3	0	Spint2	6.02281e-98	Btg1	1.18782e-95	Syt4	3.14127e-89	Gm17750	1.17337e-136	Mdk	4.81279e-94	Prox1	8.63051e-126	Hba-a2	3.04499e-110	Ckb	2.14874e-133	Gad2	1.91627e-30	Ndnf	1.00756e-94	C1qb	1.39476e-52	Bsg	3.57041e-46	Eva1b	1.66743e-35
3	Tmsb4x	0	Lhx6	0	Tenm2	4.10713e-256	Nfib	0	Islr2	0	Meis2	2.42222e-77	Satb2	4.16428e-185	Tmsb10	6.82771e-135	Bcl11b	6.00595e-148	H2afv	3.09434e-301	Slc1a3	0	Stmn2	2.09283e-94	Dlx6os1	3.99979e-92	Stmn1	1.37201e-78	Dlx6os1	3.37941e-121	Ccnd2	4.88212e-85	Kcnk1	6.95756e-95	Hbb-bt	3.40061e-110	Fabp7	6.34441e-133	Nxph1	3.45179e-29	Cacna2d2	1.40721e-94	Ctsd	8.59027e-52	Igfbp7	1.2283e-45	Myl9	1.80522e-35
4	Gria2	0	Cox5a	0	Tmem158	1.02081e-254	Meis2	0	Crym	3.22102e-289	Pantr1	4.70306e-72	Gpm6a	4.71649e-174	Pbx1	2.52498e-124	Sox5	1.73079e-147	Hmgn2	1.37495e-300	Ptprz1	0	Kitl	2.93081e-93	Nnat	2.83344e-88	Rprm	1.49962e-78	Arl4c	3.95771e-115	Vim	5.70926e-81	Nfib	6.64491e-90	Alas2	3.57638e-95	Rpl13	1.03065e-119	Dlx1	3.60551e-26	Pcp4	9.61169e-92	C1qc	2.26028e-51	Spock2	6.82185e-44	Igfbp7	2.97096e-35
5	Igfbpl1	4.03872e-281	Rpp25	0	Gap43	1.06113e-253	Itm2b	2.96495e-291	Rnf182	1.85518e-282	Sox11	1.25943e-71	Pbx1	9.07906e-170	Gucy1a3	2.94711e-106	Dync1i1	1.29489e-133	Pbk	1.09069e-279	Mfge8	0	Dner	2.55083e-92	Gad2	1.26187e-87	Serf1	2.46688e-71	Dlx2	1.24851e-98	H2afv	3.52527e-80	Gadd45g	1.53132e-87	Ube2l6	2.23917e-47	Dbi	1.04758e-116	Dlx2	3.72375e-26	Gap43	2.24042e-78	C1qa	3.69746e-50	Itm2a	4.96183e-43	Serpinh1	3.8533e-35
6	Pantr1	5.57886e-279	Ybx1	0	Dok5	1.81213e-240	Sox4	1.99986e-276	Opcml	3.84236e-263	Pou3f2	1.40753e-70	Stmn1	1.85401e-163	Csrnp3	1.85931e-101	Tmem108	1.91265e-127	2700094K13Rik	6.17836e-273	Aldoc	0	Uchl1	1.51999e-83	Dlx5	1.33328e-72	Rac3	5.48232e-71	Ap1s2	5.09655e-96	Gng5	1.75515e-79	Calb2	5.90083e-86	Fech	4.70275e-44	Slc25a5	3.087e-114	Maf	1.09105e-25	Gm27199	2.48409e-77	Arpc1b	4.02031e-50	Ramp2	2.55352e-41	Ebf1	4.49089e-35
7	Ptma	6.20149e-279	Arx	0	Stmn2	1.706e-237	Sstr2	3.97412e-246	Nrp2	1.29868e-261	Neurod2	4.64473e-69	Dok5	2.41141e-151	Macrod2	8.77169e-98	B3gat1	5.12821e-125	Ccnd2	4.34532e-266	Cst3	9.33179e-308	Nnat	6.00954e-83	Malat1	3.17889e-65	Dok5	3.71194e-67	Npas1	4.90107e-94	Neurog2	2.62038e-79	Nfia	9.15738e-86	Mkrn1	1.55265e-28	Ppp1r14b	1.1387e-113	Xist	8.1774e-22	Snhg11	7.16597e-77	Apoe	1.72414e-49	Flt1	5.19221e-41	Atp1a2	1.61408e-34
8	Cntn2	2.84058e-259	Nrxn3	0	Rac3	4.93782e-220	Sema3c	4.02498e-196	Sema3c	2.6222e-257	Nfib	1.92161e-57	Cul4a	1.7492e-146	Stmn2	1.7945e-95	Calm2	3.7062e-119	Smc2	1.1645e-259	Apoe	4.24649e-305	Fam19a2	5.03298e-80	Dlx1	4.75739e-65	Fam19a2	6.90356e-66	Nnat	4.62197e-91	Fam210b	6.9988e-76	Igfbpl1	1.87804e-75	Fam220a	3.22939e-20	Ptprz1	6.81557e-99	Cited2	1.13375e-21	Gm28050	2.41486e-75	Ftl1	4.16568e-49	Ctla2a	5.68604e-41	Higd1b	2.37874e-34
9	Ttc28	6.0551e-257	Gria1	8.78112e-300	Runx1t1	2.15413e-219	Tagln3	4.35527e-195	Epha4	5.72395e-227	Sox4	1.25205e-54	Zeb2	6.29234e-143	Rac3	4.10911e-89	Gap43	2.47947e-114	Smc4	2.09141e-259	Pea15a	1.28398e-293	Meg3	2.21692e-76	Meis2	2.67709e-62	Lhx2	4.12303e-65	Nrxn3	2.8773e-86	Hmgb2	8.07383e-70	Hist3h2a	1.26254e-62	Isg20	1.2588e-13	Rlbp1	1.89614e-92	Tcf4	1.90151e-20	Diablo	4.06253e-75	Hexb	1.67582e-48	Gng11	2.83814e-40	Vtn	2.39929e-34
10	Tubb2b	2.91355e-247	Mafb	2.09606e-272	Ly6h	1.32176e-200	Mdk	6.77426e-195	Slc16a2	5.93061e-218	Gm17750	4.98418e-51	Lpl	1.27328e-137	Lmo4	4.17377e-88	Xpr1	3.06594e-113	Anp32b	3.90562e-253	Mt1	2.84978e-288	Nefl	2.07081e-73	Pfn2	3.67829e-62	Sepw1	6.61757e-64	Cnr1	2.28265e-84	Zbtb20	2.2106e-65	Sstr2	4.32844e-60	Rec114	2.13337e-12	Ddah1	5.71447e-90	Lhx6	4.80384e-20	Lhx5	5.2961e-74	Lgmn	4.13743e-48	Slc7a5	7.11941e-40	Rgs5	2.56245e-34
11	Dab1	1.39132e-244	Ftl1	4.22557e-237	Tubb3	5.81953e-193	Pcp4	3.6654e-193	Lmo1	3.10057e-216	Pou3f3	2.30658e-46	Fam19a2	1.84061e-133	Ptn	4.0116e-87	Tmsb10	5.40189e-113	Hmgb1	3.00577e-251	Gng5	1.14343e-283	Chodl	4.73973e-72	Dlx2	2.65892e-55	Stmn2	1.39199e-61	Btg1	5.90718e-81	Cd63	3.96946e-65	Nfix	5.86965e-60	2019-03-02	6.10678e-09	Qk	9.79595e-87	Rpp25	3.23189e-18	Tmem163	4.86005e-73	Fcgr3	7.67959e-48	Vwa1	1.59951e-39	Gng11	3.19011e-34
12	Abracl	8.22034e-241	Dlx2	2.02219e-217	Arpp21	2.53835e-181	Ppp2r2b	2.49263e-182	Selm	2.18358e-175	H3f3b	3.15845e-43	Cadm2	7.6605e-114	Mif	8.46011e-87	Ssbp2	1.81891e-112	Ran	1.10222e-249	Vim	2.24979e-276	St6galnac5	1.26131e-69	Nrxn3	2.57651e-53	Tmsb10	7.94538e-61	Fxyd6	6.92095e-78	Rps18	8.92428e-65	Ier5	7.7104e-57	Rsad2	2.65016e-08	Pdgfra	1.43357e-84	Nnat	1.01408e-17	Lhx1os	7.33591e-73	Tmsb4x	2.81433e-46	Fth1	3.33261e-39	2019-09-04	3.52709e-34
13	Satb2	7.78091e-214	Xist	1.96178e-202	Mef2c	2.66426e-181	Zbtb20	1.08638e-177	Itm2b	1.06855e-169	Nrp1	1.18231e-41	H2afz	2.66562e-112	Lrfn5	4.48781e-85	Sybu	1.01759e-107	Cks2	1.43329e-247	Ddah1	1.82872e-257	Nrp2	8.18309e-69	Meg3	4.49148e-53	Serp2	1.42796e-57	Htr3a	3.89987e-71	Pax6	4.79448e-62	Tmem178	1.46154e-56	Gypa	5.65164e-08	Bcan	2.70852e-82	Mafb	1.50692e-17	Clstn1	1.10362e-70	B2m	1.34002e-45	Klf2	6.29514e-39	Cald1	2.94743e-33
14	Cd24a	4.74559e-210	Gad2	1.36184e-197	Ldb2	4.98883e-180	Ddah2	2.50731e-171	Rtn1	8.03039e-169	Ttc28	2.8404e-41	Zbtb18	4.44971e-109	Mapt	5.01053e-85	Snap25	9.44414e-103	Tuba1b	1.26875e-243	Phgdh	2.9877e-257	Prnp	1.18562e-67	Sox4	6.05096e-53	Gucy1a3	1.13692e-53	H3f3b	1.50774e-69	Ndufc2	1.0209e-60	Ppib	3.27206e-52	Bola3	9.28695e-08	Ednrb	4.38622e-81	Gria1	4.93721e-17	Ifitm2	5.30973e-69	Fcrls	1.56435e-45	Slc3a2	9.17393e-39	Abcc9	4.7188e-33
15	Bhlhe22	1.24286e-206	Mef2c	2.13939e-191	Sobp	3.26056e-174	Ldhb	2.692e-170	Gap43	6.38346e-158	Hs6st2	1.82567e-38	Stmn2	2.23279e-106	Crmp1	9.4882e-79	Grin2b	1.92547e-97	Birc5	6.11747e-243	Plpp3	7.39277e-244	Pcsk1n	4.15671e-66	Tubb5	3.35039e-50	Mpped1	3.12246e-53	Sub1	6.83543e-67	Rps9	7.7987e-60	Epha4	1.2178e-50	Ube2c	1.02846e-07	Zeb1	1.79114e-79	Nrep	3.8655e-16	Nr2f2	5.61173e-69	Ctsb	2.23856e-45	Egfl7	4.73488e-38	Igf2	4.77583e-33
16	Eif1b	3.60907e-206	Camk2n1	1.29246e-189	Msra	3.63398e-171	Tsc22d1	2.96987e-161	Calm1	2.23647e-144	Cd24a	8.14412e-38	Abracl	7.35313e-104	Hmgcs1	1.02643e-78	Neto2	3.41073e-97	Tmpo	3.25595e-236	Qk	3.13256e-240	Nsg2	2.11708e-64	Ftl1	1.16259e-43	Gng3	7.97931e-50	Akap7	1.19467e-60	Rpl41	1.0145e-56	Synpr	2.84805e-48	Blvrb	5.25089e-07	Rps18	1.56212e-73	Sox11	7.83616e-16	Cd200	1.86452e-68	Sepp1	1.07416e-44	Sepp1	8.97697e-38	Col4a1	6.616e-33
17	Neurod6	5.25013e-205	Pfn2	9.86081e-162	Satb2	8.01952e-167	H1f0	2.34058e-153	Gabra2	1.47189e-142	Robo2	3.44055e-36	Osbpl1a	1.89977e-100	Pcdh17	5.13715e-78	Ptprd	6.23061e-97	Top2a	9.34918e-236	Hes5	2.68172e-239	Socs2	8.95008e-63	Tubb3	1.79428e-41	Ptprd	1.20545e-47	Dlx5	3.75649e-59	Mmd2	2.30788e-56	Tmsb4x	2.92289e-48	Bpgm	1.55651e-06	Sox9	5.43396e-73	Camk2n1	1.217e-15	Cxcl12	4.80273e-68	Rps29	8.54873e-44	Col4a2	9.52465e-38	Ifitm3	7.07349e-33
18	Tuba1a	6.43114e-205	Gng2	2.21548e-161	Tshz2	2.10153e-163	Nfix	5.37057e-148	Mapt	4.51613e-142	Gpm6a	3.53803e-36	Crip2	2.28237e-99	Dok5	7.70575e-78	Camk2n1	2.18909e-92	Spc24	1.82825e-230	1810037I17Rik	6.87166e-236	Ly6h	1.57525e-62	Ccnd2	9.04347e-39	Fn1	3.52189e-47	Cxcl14	1.4627e-54	Lhx2	1.48077e-55	Dusp14	2.26757e-47	Pnpo	3.65593e-06	Serpine2	2.56268e-71	Dlx5	1.62188e-15	Nrn1	1.87971e-66	Ctsz	1.97689e-43	Cd34	2.46643e-37	Sparc	8.0054e-33
19	Tubb5	3.58205e-203	Dlgap1	4.34928e-152	Tshz3	3.75605e-161	Ddx5	2.88016e-140	Nfia	5.06014e-142	Zbtb18	2.65684e-35	Opcml	5.00883e-99	Gap43	9.28948e-78	Camkv	5.63893e-92	Cdca8	1.99559e-228	Atp1a2	4.34769e-235	Stmn4	2.27706e-61	Rps9	4.0363e-34	Dok4	1.65523e-46	Tcf4	1.91296e-54	Ndrg2	1.77544e-55	Pcp4	1.08049e-46	Slc25a37	1.79655e-05	Ncald	9.68701e-70	Dlx6os1	2.36943e-15	Pdgfa	5.71127e-65	Ly86	2.84941e-43	Slc7a1	3.33806e-37	Oaz2	5.25443e-32
20	Bzw2	6.74695e-189	Ndufa5	6.84229e-152	Gpr85	1.10792e-157	Cttnbp2	2.02017e-136	Fabp5	1.74132e-131	Ddah2	1.01137e-33	Gucy1a3	1.40813e-98	Meis2	2.86518e-77	Ldb2	6.87209e-83	Dbi	1.80078e-227	Ndrg2	1.30677e-234	Sepw1	1.02056e-60	Rnd3	1.38693e-32	Pcdh7	2.16653e-46	Celf4	4.29965e-53	Ezr	3.57665e-55	Nrxn1	3.05616e-45	Slc25a39	3.26181e-05	Rps8	6.48211e-68	Celf4	3.11979e-15	Cystm1	6.21324e-65	Trem2	2.92317e-43	Sparcl1	5.37726e-37	Pdgfrb	1.32051e-31
21	Bcl11a	8.91432e-186	Cited2	4.1567e-147	Nefl	3.56885e-156	Laptm4a	3.20278e-130	Cck	9.42001e-131	Frmd4b	4.6891e-32	Dync1i1	8.39953e-96	Cnih2	1.20557e-76	Ina	7.87346e-83	Cks1b	5.86948e-226	Cd9	1.30532e-227	Lmo1	7.35011e-60	Tuba1a	4.9491e-32	Stmn3	1.19447e-45	Prox1	3.86274e-50	Cst3	6.80641e-55	Sema5a	7.6879e-45	Fam46c	4.78563e-05	Rpl23	1.68741e-67	H3f3a	2.49226e-14	Aldoa	8.35375e-64	Laptm5	3.05128e-43	Serpinh1	9.3665e-37	Col4a2	1.729e-31
22	Csrp2	3.12867e-184	Syt1	8.00958e-141	Arpc5	1.80926e-152	Unc5d	6.022e-128	Carhsp1	1.79203e-123	Cttnbp2	2.00536e-31	Hs6st2	2.89836e-95	Serf1	6.32162e-74	Rac3	1.8912e-82	Anp32e	3.11318e-221	Mt2	4.44757e-226	Trps1	3.05717e-59	Prdx2	5.09407e-32	Rplp1	4.97405e-45	Xist	1.1329e-46	Slc1a3	4.54289e-53	Islr2	1.48772e-44	Isca1	6.51815e-05	Sox8	5.41272e-66	Zeb2	4.78044e-14	Trp73	2.84525e-63	Gatm	9.85578e-43	Ecscr	4.05364e-36	Cd81	2.28161e-30
23	Ubb	3.0096e-183	Rps13	7.31193e-134	Osbpl1a	4.01361e-147	Malat1	7.96341e-121	Nfix	3.01316e-122	Mllt3	1.17852e-30	Arpp21	8.77303e-87	Map1b	2.30358e-73	Cadm1	5.22278e-82	Rrm2	1.15952e-218	Ptn	9.08192e-226	Sncb	3.07751e-59	Cdca7	1.78687e-30	Ssbp2	5.85198e-45	Erbb4	2.7563e-46	Rpl32	7.02718e-52	Ppp1r14c	6.34109e-43	Adipor1	0.000271813	Ppib	8.0772e-66	Meg3	1.13782e-13	Ppp2r2c	5.08208e-63	Cst3	1.13586e-42	Gng5	4.39349e-36	Myl12a	2.75535e-30
24	Zbtb18	4.87457e-175	Zeb2	1.33224e-132	Sepw1	2.20076e-145	Prdx2	1.23963e-120	Fgfr1	4.48699e-122	Unc5d	2.55953e-30	Macrod2	1.21398e-86	Arpp21	2.78919e-73	Sez6	8.19137e-82	Dek	2.91319e-212	Gpm6b	9.80844e-225	Nme1	5.81171e-59	Bcl11b	4.91818e-30	Map1b	6.2007e-45	Rtn1	7.78589e-46	Thrsp	9.50574e-52	Sox11	7.41356e-42	Epb41	0.000282995	Rps3a1	1.70279e-63	Myt1l	4.19894e-13	Rcan2	5.63579e-63	Ctsl	6.25575e-42	Pglyrp1	4.39599e-36	S100a11	6.12996e-30
25	Ptn	5.64421e-175	Mllt11	1.31567e-131	Mif	1.31798e-143	H2afv	1.01285e-115	Neurod6	8.85398e-122	Rbfox1	4.41962e-30	Ntm	3.00229e-85	Cbln2	6.71556e-72	Scn2a1	5.45821e-81	Cdk1	2.42773e-210	Ckb	5.37722e-221	Mgst3	1.29372e-58	Actg1	8.33304e-30	Nrxn1	6.31649e-45	Pnoc	6.16733e-45	Slc25a5	3.47234e-51	Eef2	3.9515e-41	Isg15	0.000401763	Rpl32	3.7454e-61	Nsg2	6.12353e-13	Meg3	3.97997e-61	Rgs10	6.30531e-42	Rpl38	1.26874e-35	Tpm4	4.70678e-29
26	Pou3f3	7.31002e-174	Ubb	2.35936e-126	Stmn3	1.93037e-143	Neurod1	1.55049e-114	Cntn2	6.92517e-120	Laptm4a	7.34179e-30	Tmsb10	4.56446e-85	Atp5e	6.1978e-70	Enc1	5.28039e-80	Cenpf	5.56164e-204	Prdx6	2.53113e-214	Ina	1.30524e-58	Hmgn2	1.38783e-29	Gpm6a	7.08397e-44	Malat1	8.49541e-45	Npc2	9.73706e-51	Lrpap1	4.35516e-41	Ucp2	0.00124061	Rps4x	2.18069e-60	Slc6a1	7.64667e-13	Ly6h	1.29648e-60	Ptpn18	6.41856e-42	Slc2a1	1.79677e-35	Cd63	1.8776e-28
27	Pou3f2	2.24689e-166	Malat1	1.12632e-124	Thra	8.74257e-142	Pou3f2	8.22391e-112	Kcnk1	1.30217e-115	Ptma	4.01767e-29	6330403K07Rik	2.56239e-84	Nrip1	2.38578e-69	Islr2	5.61845e-80	Ccna2	3.82113e-203	Mmd2	4.06612e-211	Rac3	8.78298e-58	Tmsb10	2.10871e-29	Wnt7b	3.4557e-43	Ndufa5	1.04946e-43	Fabp7	1.48368e-50	Rwdd3	1.3317e-39	Mpp1	0.00126416	Vim	1.49497e-59	Ttc28	1.76169e-12	1500009L16Rik	1.35859e-60	Ctss	4.3211e-41	Col4a1	1.869e-35	Fstl1	3.03269e-28
28	Sox4	2.08157e-153	Pcsk1n	7.19109e-124	Gm1673	2.5691e-139	Gm17750	1.76605e-108	Ddah2	8.78595e-114	Bcl11a	8.0835e-29	Gpr85	2.30932e-82	Ptms	8.3572e-69	Caly	4.39322e-74	Lockd	1.67749e-202	Ttyh1	1.28837e-209	Map1b	7.72748e-57	Ccdc88a	2.55306e-29	Crmp1	3.70848e-42	Gad2	9.58258e-42	Rps6	5.25212e-50	Prox1os	1.76957e-39	Snca	0.00244468	Rps6	1.55849e-58	Dcx	4.54186e-12	Map1lc3a	3.95262e-60	Rpl35a	3.58855e-40	Myl12a	1.47106e-34	Bgn	3.7044e-28
29	Tspan13	1.514e-143	H2afy2	4.39764e-123	Ptms	1.53108e-137	Neurod2	6.21551e-107	Xpr1	6.88452e-113	Pbx1	1.60742e-27	Celf2	2.82096e-82	Mef2c	1.53046e-68	Tenm2	6.6924e-73	H2afx	1.17455e-199	Tnc	6.63816e-208	Ntm	7.9841e-57	Rpl18a	4.42987e-28	Ptms	3.3156e-41	Gad1	4.21822e-41	Prdx1	9.2446e-50	Cd63	1.62635e-38	Car2	0.00266396	Rpl8	3.32001e-53	Syt1	5.5022e-12	Cdh4	3.51843e-59	Aif1	2.0364e-39	B2m	2.17766e-34	Nid1	4.8283e-28
30	Uchl1	1.94811e-138	Dlx1	5.95035e-123	Bcl11a	4.6842e-134	Lhx2	1.99334e-106	Uchl1	3.24092e-112	Ptn	1.63221e-27	Pantr1	1.12693e-81	Ncald	1.69866e-66	Tle4	6.61383e-70	Ube2c	2.44097e-195	Acot1	1.19463e-201	Islr2	2.86692e-56	H3f3b	6.93396e-28	Nudt4	3.42059e-40	Adarb2	1.16925e-38	Tead2	1.03978e-49	Tagln3	2.16214e-37	Ncf4	0.0026721	Scrg1	4.53543e-53	Erbb4	7.88466e-12	Emx2	5.37051e-58	Hexa	2.8305e-39	Eva1b	2.21023e-34	Rasgrp2	5.1605e-28
31	Stmn4	1.17546e-137	Dlx5	2.48133e-121	Tuba1a	6.90281e-134	Hspa8	1.74124e-105	Nfib	7.03301e-112	Hspa8	2.20909e-27	Tubb3	2.25422e-81	Gucy1b3	1.39311e-65	Grm5	5.831e-67	Cdca3	4.10724e-194	Ccnd2	1.77855e-196	Mif	1.31672e-55	Tiam2	7.16968e-27	Arpp21	5.02437e-40	Synpr	1.47659e-38	E130114P18Rik	3.69446e-49	Calm1	2.3861e-37	Cdc25b	0.00435734	Rps27a	4.5947e-53	Gad1	9.4833e-12	Cit	2.13921e-55	Cyba	5.11987e-39	Kdr	4.75249e-34	Cthrc1	6.29446e-28
32	Tubb3	1.14467e-128	Atp1b1	6.20933e-117	Nrxn1	1.54024e-132	Pantr1	1.94151e-104	Sepw1	7.39062e-109	Jakmip1	1.58358e-25	Serf1	4.50296e-79	Satb2	6.40671e-62	Adcy1	1.67744e-66	Mki67	6.16386e-190	Glul	4.53681e-192	Stmn3	1.65465e-55	Gad1	9.52265e-27	Satb2	7.98386e-40	Npas3	8.13806e-38	Eomes	1.30925e-48	Nrp2	4.73341e-37	Hebp1	0.00495651	Rps27l	6.62673e-53	Sp9	1.66163e-11	Cd47	3.95455e-55	Pfn1	2.60097e-38	Esam	6.80541e-34	Ppic	3.94178e-27
33	Dok5	3.14554e-126	Evl	4.37557e-115	Tmsb10	5.88548e-131	Gpm6b	4.27848e-98	Stmn2	1.24758e-107	Frmd4a	7.34545e-25	Enc1	2.9924e-77	Gpr85	1.14924e-60	Atp1b1	4.28868e-66	Vim	2.52553e-188	Mlc1	2.67767e-182	Mapt	3.47061e-55	Hnrnpa1	1.5113e-24	Sybu	1.4426e-39	Ubash3b	1.47222e-34	Gadd45g	1.69953e-48	Nhlh2	1.2683e-36	Cdr2	0.00850366	Chd7	1.04425e-52	St8sia2	3.15846e-11	Calb2	1.44346e-54	Fau	3.92368e-38	Ccdc141	8.32289e-33	Rgs4	2.51024e-26
34	Id2	1.08952e-124	Igfbp4	5.53823e-111	Dynll1	2.5922e-129	Elavl2	7.47985e-92	Grp	5.03124e-105	Abracl	1.14779e-24	Bend6	1.33395e-73	Sms	1.37244e-60	Rpl41	2.53082e-64	Cenpm	2.30726e-187	Cnn3	3.10167e-177	Sphkap	4.7282e-55	H2afv	4.89848e-24	Gas7	3.68667e-39	Camk2n1	3.70083e-34	Rpl13a	5.5337e-48	Mfap4	2.63374e-33	Dhrs11	0.00992885	Asrgl1	2.89198e-52	Kcnq1ot1	5.18595e-11	Cacna2d1	3.37625e-54	Lamp1	4.5947e-37	AU021092	6.58404e-32	Ifitm1	6.4141e-26
35	Celf2	3.4855e-121	Slc6a1	2.00458e-107	Ppp3ca	3.43071e-127	Lmo1	2.30942e-90	Map1b	6.08709e-105	Neurod6	1.25936e-24	Tgfbr1	7.7962e-73	Cox8a	2.30565e-59	Cnih2	3.03093e-64	Slc25a5	1.60819e-185	Tsc22d4	1.14428e-172	Calm2	3.55363e-54	Rps14	1.26629e-21	Thra	8.94531e-39	Ubb	1.42619e-33	Rpl8	2.34537e-47	Emx2	2.79268e-33	Hscb	0.0103093	2019-09-07	4.16658e-52	Ccdc88a	1.19832e-10	Car10	1.78135e-53	P2ry12	7.46029e-37	Arpc1b	1.82069e-31	Myl6	7.34454e-26
36	Hs6st2	3.62152e-121	H3f3b	4.31568e-105	Mpped1	9.8577e-123	Paip2	4.57677e-89	Mgst3	3.80623e-104	Ddx5	7.05794e-24	Lrfn5	2.092e-72	Cd24a	1.31265e-58	Mllt11	3.32734e-64	Lmnb1	2.2971e-185	Gnai2	8.4484e-172	Gng3	4.23224e-54	Hnrnpk	5.49207e-21	Nme1	1.95786e-37	Tmsb10	5.8058e-33	Mfap2	3.51147e-47	Btbd17	3.32554e-33	Slc4a1	0.0168235	Rps15a	6.11998e-52	Cox5a	1.57838e-10	Pcsk1n	1.00272e-52	Rps12	1.33556e-36	Myl6	2.5034e-31	Zic1	1.30558e-25
37	Mn1	5.78864e-118	Celf4	1.11712e-101	Fdps	4.67354e-117	Rnd2	4.88126e-88	Neurod1	6.70672e-103	Bzw2	3.41324e-23	Mif	2.1976e-72	Gnal	1.71568e-58	Tshz3	3.24949e-62	Gng5	6.85455e-182	Syt11	1.32883e-168	Tbca	1.44461e-53	Fus	7.35458e-21	Ncam1	2.61013e-37	Pfn2	6.14652e-33	Eci2	5.03391e-47	mt-Co1	3.78325e-33	AI662270	0.0172022	Rpl36	1.78264e-51	Akap7	1.95571e-10	Smad1	1.53181e-52	Hpgds	1.70017e-36	Mfsd2a	7.61555e-31	Sparcl1	1.50558e-25
38	Eif4a2	2.47115e-110	Ackr3	2.47685e-101	Nefm	6.60513e-117	Tcf4	8.81317e-88	Bbip1	5.25762e-102	Id2	6.51033e-23	Foxp1	2.96613e-72	Nop10	3.64822e-58	Evl	4.39183e-62	Hmgn1	1.8067e-181	Mid1ip1	1.26017e-167	Rtn1	1.81319e-53	Rps23	1.45604e-20	Mif	3.55461e-36	Prox1os	3.1244e-32	Apoe	1.38778e-45	Mtss1	1.03492e-32	Riok3	0.0239677	Rpl18a	2.42088e-51	H3f3b	2.68734e-10	Gnas	4.60215e-49	Sat1	3.05131e-36	Cd93	7.81305e-31	2019-09-07	2.16443e-25
39	Cirbp	5.00942e-109	Meg3	1.7156e-100	Ssbp2	1.03103e-115	Mllt3	8.55976e-86	Nr4a3	2.54977e-98	Mn1	1.69241e-22	Sla	2.82204e-69	Dync1i1	1.02799e-57	Sepw1	3.22076e-59	Fabp7	2.25336e-181	Tst	2.20167e-164	Nsg1	1.14025e-52	Eif3h	3.30096e-20	Caln1	1.50157e-35	Slc32a1	7.1911e-32	Mt1	4.49729e-45	Emx1	2.07945e-32	Trim10	0.0467106	Rpl37a	1.65225e-50	Ank3	3.24624e-10	Gdf5	2.26667e-48	Spi1	6.72209e-36	Pecam1	1.21602e-30	Ets1	5.49514e-25
40	Gpr85	1.46658e-101	Tubb2a	2.05023e-97	Crip2	3.55842e-114	Cdk4	1.59691e-85	Cyb5a	2.55839e-98	Cux1	1.63092e-21	Sybu	6.25346e-69	Dpysl2	5.02907e-57	Opcml	3.76946e-59	Clic1	2.07771e-180	Cd63	7.33036e-164	Hn1	9.30353e-52	Wbp5	3.52713e-20	Ly6h	3.54258e-35	Olfm1	4.46568e-30	Cdk2ap1	6.50914e-44	Malat1	3.05383e-32	Hbq1b	0.0528738	Cd9	2.36302e-50	Mef2c	3.86302e-10	Dync1i1	6.80761e-48	Clta	7.16157e-36	BC028528	1.21772e-30	Pfn1	7.13427e-25
41	Macrod2	1.09387e-96	Akap7	4.01643e-97	Nrep	3.99849e-114	Epha5	2.05633e-85	Thra	5.57509e-98	Cntn2	4.19036e-20	Limch1	3.0538e-67	Fkbp1a	2.26633e-56	Arpp21	4.68789e-59	Spc25	4.41041e-180	Sox9	1.62928e-160	Mllt11	1.92019e-51	Snrpe	2.02624e-19	Basp1	1.04732e-34	Cpe	8.29323e-29	Acot1	1.06689e-43	Fxyd6	4.23141e-32	Tspo2	0.0549887	Eef1d	8.12413e-50	Arl4c	4.08966e-10	Olfm1	8.74117e-48	Csf1r	7.17856e-36	Tagln2	7.16695e-30	2019-09-11	8.21827e-25
42	Hsp90ab1	1.72146e-96	Arl4c	4.29295e-95	Dab1	6.07581e-113	Trim2	4.7713e-84	Syt4	4.92591e-97	Ldhb	5.11262e-20	Pou3f1	1.58197e-64	Grp	4.77588e-56	Ncam1	1.74531e-57	Racgap1	3.25024e-175	2019-09-15	9.89333e-160	Basp1	3.24421e-50	Mpped2	2.31842e-19	Osbpl1a	3.95079e-34	Bex2	4.10044e-28	Btg2	1.50712e-43	Pik3r1	4.63605e-32	Syt14	0.0776766	Gng12	9.25633e-50	Elmo1	5.98324e-10	Dtnbp1	2.60954e-47	Clic1	2.09397e-35	Slco1c1	7.34336e-30	Cnn2	1.13585e-24
43	Frmd4a	2.73482e-94	Slc32a1	5.60009e-95	Mapt	1.83592e-109	Frmd4b	6.13397e-84	Dpysl3	2.38743e-96	Cyth2	8.09752e-20	Dfna5	3.43892e-63	Evl	1.20034e-55	Thra	2.81902e-57	Tpx2	1.18341e-174	Pdpn	1.14104e-154	Nefm	1.18001e-49	Rps27	4.74726e-19	Arpc5	1.11618e-33	Slc6a1	3.12236e-26	Rps27a	4.65843e-43	Socs2	6.45884e-30	Cox6b2	0.0831326	Cspg5	1.04938e-49	Gng2	6.27554e-10	Msi2	6.18209e-47	Ltc4s	8.09998e-35	Slc22a8	9.73545e-30	Cox4i2	1.17812e-24
44	Gabra2	1.97536e-93	Nxph2	3.6524e-92	Uchl1	1.93617e-108	Tbr1	4.56577e-81	Fezf2	2.20311e-95	Foxg1	2.52023e-19	Ptprd	1.21773e-62	Eif1b	6.66023e-55	Ctnnd2	2.98506e-57	Hnrnpf	1.32834e-169	Scp2	2.8813e-154	Grrp1	3.17914e-49	Rpl35a	1.67838e-18	Lrrn3	1.19417e-33	Nr2f2	5.42164e-26	2019-09-15	7.38407e-43	H3f3b	8.01407e-30	Txnrd2	0.0921519	Rpl39	8.69967e-49	Mpped2	1.05527e-09	Atox1	1.1968e-46	Rnase4	8.90266e-35	Eng	9.99857e-30	Gjc1	1.54281e-24
45	Shtn1	2.74374e-93	Sp9	7.57272e-90	Itpr1	2.34364e-108	Ptov1	5.41152e-81	Cnih3	3.0606e-95	Epha5	3.53705e-19	Crmp1	1.63204e-62	Opcml	3.08804e-54	B3galt2	1.01907e-54	Ranbp1	4.93015e-169	Rgcc	2.25203e-153	Epha5	1.24529e-48	Sox2	3.72868e-18	Crip2	1.99737e-33	Maf	3.0947e-25	Rps24	2.74586e-42	Dpysl4	3.42578e-29	Pla2g16	0.144296	Gng5	1.48164e-48	Cbfa2t3	1.10822e-09	Kcnh7	3.25778e-46	Rpl32	1.721e-34	Foxq1	1.50505e-29	Vasp	5.452e-24
46	Hsp90aa1	7.83504e-93	Elavl2	9.87899e-90	Arhgdig	6.04139e-106	H3f3a	1.79964e-80	Igfbpl1	1.0935e-93	6330403K07Rik	5.67138e-19	Prkar2b	5.95289e-60	Ppp1r1a	6.69798e-54	Stmn3	1.1008e-54	Cenpa	1.11136e-166	Hmgn3	6.03043e-152	Eif1b	2.90766e-48	Arx	8.89077e-18	Dynll1	2.22568e-33	Snrpn	4.538e-25	H1f0	9.59658e-42	Cpe	1.65892e-27	Psme3	0.175024	Rpl7	2.95279e-48	Pfn2	1.14912e-09	Islr2	1.29771e-45	Grn	3.87764e-34	Tpm4	1.50764e-29	Clic1	6.48492e-24
47	Myt1l	2.56641e-90	Gm13889	6.25942e-88	Mllt11	1.45269e-105	Pam	6.97135e-79	Csrp2	3.42136e-93	Maged1	9.35049e-19	Jakmip1	3.62192e-57	Runx1t1	8.30248e-52	Dynll1	3.49325e-54	Ccdc34	5.63953e-166	Bcan	1.76386e-150	Bhlhe22	8.32859e-48	Pou3f4	4.82521e-17	Ank2	5.84434e-33	Hmgn2	2.7697e-24	Vps37b	1.31411e-41	Mmd	2.19809e-27	Rhd	0.186962	Atp6v0e	9.60122e-48	Cmip	1.22532e-09	Tubb4b	1.85409e-45	Arhgdib	5.00168e-34	Ankrd37	4.95658e-29	Myo1b	1.06125e-23
48	Hspa8	1.98815e-87	Erbb4	1.76567e-86	Dkk3	2.09101e-105	Gria2	4.47051e-76	Pik3r1	5.20247e-92	Nfix	1.07622e-18	Cux1	5.54014e-56	Ptpro	7.11896e-51	Sparcl1	6.10529e-54	Ccnb1	5.15529e-162	H2afv	4.38872e-149	Lingo2	4.37936e-47	2700060E02Rik	7.05431e-17	Klf7	1.26174e-32	Cirbp	9.98092e-24	Rps4x	2.20252e-41	Cntnap2	2.75125e-27	Sh3glb1	0.225243	Zfp36l1	1.41728e-47	Dlgap1	2.20233e-09	Fkbp9	1.35598e-44	Gng5	7.25425e-34	Cav1	6.03047e-29	Tagln2	1.09291e-23
49	Hist3h2ba	7.11167e-87	Gad1	7.80877e-85	Ncam1	4.18072e-102	Fabp7	6.60345e-76	App	5.16926e-90	Sema3c	1.18708e-18	Gas7	9.08543e-56	Acat2	3.00989e-50	RP23-407N2.2	3.2344e-52	Pmf1	2.15601e-154	Ncan	3.85808e-147	Csrp2	1.25897e-46	Cox7a2l	9.77188e-17	Limch1	6.52625e-32	Cbln2	3.37959e-23	Gstm5	2.35215e-41	Calm2	4.00561e-27	Nxpe2	0.23467	Traf4	1.67237e-47	Ankrd12	2.2401e-09	Zfand5	1.74093e-44	Ccl3	7.85586e-34	Adgrl4	8.02764e-29	Uaca	1.5217e-23
50	Foxg1	7.55225e-87	Ptma	2.46464e-80	Pou3f1	1.03379e-101	Hnrnpa1	2.6657e-73	Ly6h	5.06196e-85	Hist3h2ba	7.85354e-18	mt-Atp6	1.6394e-55	Stmn3	3.12284e-50	Sncb	1.68593e-51	H1f0	2.37256e-154	Cspg5	7.90066e-147	Grm5	1.67262e-46	Carhsp1	1.16833e-16	Ppp1r1a	8.60055e-32	Tubb2a	4.52792e-23	Eef1d	8.28092e-41	Hist1h2bc	4.95483e-27	Gm26917	0.260511	Rpl13a	2.43001e-46	Camta1	2.27585e-09	Lhx1	2.45194e-44	Crybb1	9.45981e-34	Hes1	1.05005e-28	Selm	1.79802e-23
51	Rbfox1	3.80382e-83	Grm5	1.07535e-79	Limch1	2.14145e-101	Ezr	6.29061e-67	Ntrk3	5.30383e-84	Ilf2	3.00728e-17	Nrep	3.30851e-55	Ldb2	1.95928e-49	Fxyd6	9.77787e-51	Dnajc9	4.02947e-154	Fam210b	2.28854e-145	Tpd52	3.52533e-46	Jun	1.59833e-16	Eif1b	2.24746e-31	Cox8a	2.05022e-22	Cd9	1.0367e-40	Cald1	3.18942e-26	Ifi27	0.265412	S100a16	1.03536e-45	Csrnp3	3.4064e-09	Clstn2	5.52498e-44	Pycard	1.13436e-32	Clic1	1.15927e-28	Efhd2	3.01052e-23
52	Ptov1	4.59748e-83	Rph3a	9.41273e-79	Atpif1	1.4916e-100	Eef2	1.71084e-66	Camk2b	2.93084e-83	Ubb	3.12745e-17	Camk2b	2.29903e-54	Ybx1	3.76093e-49	Adgrb3	1.04629e-50	Cenpq	4.83033e-154	Slc9a3r1	4.74557e-142	Pafah1b3	4.17939e-46	Uqcrh	1.84966e-16	Mapt	2.76917e-31	Ybx1	3.23659e-22	Rpl18	1.54221e-40	Lhx9	7.89174e-26	2500002B13Rik	0.313326	Cnp	1.44191e-45	Scn3a	3.6468e-09	Zcchc12	1.97553e-43	Npc2	4.01774e-32	Lsr	2.17379e-28	Gpx8	7.42075e-23
53	Robo2	2.71262e-81	Elmo1	1.40222e-78	Dpysl2	7.08788e-100	Rps9	4.23397e-65	Sh3bgrl	1.2195e-81	Dnaja1	5.46392e-17	Plk2	2.9883e-52	Ywhaz	3.87255e-49	Snca	2.44492e-49	Rps27l	1.36901e-148	Tspan7	1.681e-141	Atp5g1	1.12548e-45	Gm13889	4.28792e-15	1500035N22Rik	1.05211e-30	Rnf187	5.73432e-22	Chd7	3.69661e-40	Thtpa	1.94012e-25	Slc16a10	0.319815	Ndrg2	1.65089e-44	Afap1	4.22705e-09	Tbr1	1.06549e-42	Vamp8	4.15888e-32	Arl4a	2.40215e-28	Itm2b	9.06746e-22
54	Ntm	1.29637e-80	Ndufa4	1.7924e-77	Syt4	4.22664e-99	Hnrnpk	4.64596e-65	Wbscr17	1.70032e-81	Insm1	1.03793e-16	Khdrbs2	4.14028e-51	Abracl	6.92406e-49	Oma1	4.52667e-49	Nusap1	1.71213e-148	Pax6	4.38853e-136	Cfl1	4.11601e-45	Zfos1	7.39094e-15	Khdrbs2	1.69627e-30	Snx3	5.88577e-22	Ppib	2.13274e-39	Hist3h2ba	1.22103e-24	Vangl1	0.323094	Epn2	1.96027e-44	Gm13889	5.36037e-09	Aplp2	1.16447e-42	Gpr34	5.30732e-32	Anxa3	2.44731e-28	Hes1	1.63154e-21
55	Syt4	1.36157e-79	Snrpn	3.57995e-77	Ywhaq	2.03633e-98	Rasgef1b	7.30504e-64	Nav1	3.95301e-80	Fus	1.6639e-16	Cib2	1.73864e-50	Gnai1	3.05102e-48	Camk2b	5.90238e-49	Phgdh	1.17272e-147	Fgfbp3	3.90444e-134	Usmg5	1.76305e-44	Id4	7.72443e-15	Gm1673	1.70495e-30	Hmgb3	3.30024e-21	Rpl14	4.15248e-39	Banp	9.26976e-24	AK157302	0.328712	Arl2bp	5.49213e-44	Brd2	7.59468e-09	E330013P04Rik	9.84261e-42	Bcl2a1b	5.65339e-32	Gnai2	2.7517e-28	BC028528	1.98526e-21
56	Jakmip1	2.69902e-78	Mpped1	6.92824e-76	Macrod2	4.07354e-97	Elavl4	1.12382e-63	Klf7	6.01807e-80	Cirbp	2.27164e-16	Inhba	7.25216e-50	Mpped1	1.10531e-47	Stmn2	2.85289e-48	Tipin	8.65658e-147	Nrarp	1.5199e-133	Tmem158	3.60155e-43	Sp8	6.18789e-14	Plk2	5.23466e-30	Cited2	7.6352e-21	Rpl3	1.56157e-38	Stat3	1.04603e-23	Creg1	0.354369	Eno1	6.28254e-44	Serpini1	7.69539e-09	Nanos1	1.39934e-41	Cd53	5.84404e-32	Atox1	2.86656e-28	Plat	2.04344e-21
57	Actg1	5.75564e-76	Eif4a1	2.15421e-74	Serp2	9.9072e-97	6330403K07Rik	1.20911e-63	Fth1	6.47166e-80	Hsp90aa1	3.0191e-16	Map1b	3.84445e-49	2019-03-01	1.13965e-47	Bend6	1.21705e-47	Lsm5	9.11689e-146	Psph	1.74277e-133	Ntng1	1.21972e-42	Rps24	8.66212e-14	Bend6	1.70295e-29	Elavl4	9.20405e-21	Serf2	2.10114e-38	Slc1a2	1.55495e-23	Gm867	0.37358	Rcn1	2.58911e-43	Ttc3	8.9714e-09	Lsamp	3.3543e-40	Cd63	2.24261e-31	Ppic	3.21884e-28	Gper1	2.50241e-21
58	Nfix	2.10325e-73	Sst	2.83222e-73	Camk2b	2.32662e-95	Pou3f3	1.33837e-63	Pcp4	8.86604e-80	Fam171b	4.19415e-16	Tubb2a	1.91682e-47	Mlip	1.18153e-47	Lix1	1.31411e-47	Hnrnpa3	3.96205e-143	Ccdc80	3.36954e-133	Cbln4	6.90818e-41	Rpl7	1.15214e-13	Nbea	1.77773e-29	Ccdc88a	1.43417e-20	Cdk4	2.49085e-38	Nav1	6.0536e-23	Spta1	0.428439	Rpl35a	3.84296e-43	Mpped1	1.19219e-08	Zic1	3.90562e-40	Rpl10a	2.46036e-31	Rhoc	4.51731e-28	Tnfaip1	3.68889e-21
59	Fez1	2.12596e-73	Mapk10	5.77116e-72	Khdrbs2	4.77559e-95	Dbn1	1.777e-62	Hn1	1.59049e-77	Ppp2r2b	5.16151e-16	Neurod6	2.26519e-47	Acp1	1.50734e-47	Mapt	5.98277e-47	Cdkn2c	1.50773e-141	Sox2	6.45503e-129	Epha3	1.03044e-39	Rpl11	1.50369e-13	Gpr85	3.47535e-29	Asic4	1.99983e-20	Rps27l	2.54523e-38	Cttnbp2	1.20325e-22	Mylk3	0.434294	Rps9	1.09108e-42	Runx1t1	1.30537e-08	Ube3a	5.37298e-40	Rps11	5.50572e-31	Cdh5	7.99598e-28	Rhoc	5.16331e-21
60	Eif4a1	7.81938e-73	Eef1e1	4.09838e-71	Cadm1	3.79548e-93	Rpl18a	9.7896e-62	Ank3	6.49772e-77	Lhx2	8.11675e-16	Neurod2	2.74334e-47	Stmn1	1.78115e-47	Akap7	7.65092e-47	Dut	1.92078e-141	Prdx1	8.86263e-127	Tmsb10	1.70839e-39	Foxp2	3.08542e-13	Dpysl2	3.69921e-29	Tbca	1.0779e-19	Rps15a	9.51067e-38	Hecw1	2.57484e-22	Abcb4	0.473281	Tpt1	2.98849e-42	Kif2a	1.65451e-08	Rgs4	6.96975e-40	Rps16	1.79517e-30	Aplnr	8.47194e-28	Ednra	9.93789e-21
61	Plxna4	1.05478e-71	Nsg1	1.14122e-69	Crmp1	7.49755e-93	Klhdc2	3.90707e-60	Zfp385b	1.5308e-76	Tcf4	1.94852e-15	Ptms	3.03792e-47	Polr1d	2.21694e-47	Tox	1.32594e-46	Gmnn	5.01288e-141	Gpx8	1.76518e-126	Atpif1	8.60076e-39	Hnrnpa2b1	4.46516e-13	Ywhaz	5.94531e-28	Cplx2	1.89382e-19	Rpl18a	2.09156e-37	Igsf8	3.55092e-22	Lockd	0.4759	Lhfpl3	3.06969e-42	Malat1	2.5559e-08	Rpl22l1	2.59175e-39	Rplp1	2.74847e-30	Slc40a1	9.55405e-28	Vstm4	1.11376e-20
62	Cux1	5.17865e-71	Rps29	2.10804e-69	Fam49a	6.3403e-92	Maged1	1.70254e-59	Tubb2b	1.79605e-76	Eif4a2	2.27559e-15	Trim67	4.35271e-47	Tox	3.2803e-47	Ephb1	1.42636e-46	Casc5	1.18017e-140	Gstm5	8.51056e-126	Gnao1	3.07897e-38	Nedd4	1.00845e-12	Nwd2	7.47977e-28	Ly6h	8.81905e-19	Mt2	2.65501e-37	Zfand6	3.6432e-22	Dnaja4	0.48422	Ostf1	5.99089e-42	Rnf165	2.79806e-08	Dstn	2.77926e-39	Pld4	4.07504e-30	Slc38a2	9.63365e-28	Ptn	1.34662e-20
63	Cyth2	1.66601e-66	Bcl11b	8.8268e-69	Cnih2	1.45363e-91	Ttc28	8.47082e-59	Atp2b1	6.30055e-74	Tagln3	4.71679e-15	Mapt	4.60645e-47	Arhgdig	5.81158e-47	Arhgdig	3.36578e-46	Lsm2	5.41737e-140	Ednrb	2.27516e-125	Ywhag	8.68713e-38	H1f0	1.75708e-12	Cacna2d1	5.91408e-27	Vstm2a	1.21763e-18	Rpl22l1	2.87905e-37	Fgfr1	1.11073e-21	Dcaf12	0.558871	Cdo1	1.6009e-40	Gria2	3.14449e-08	St3gal5	9.94316e-39	Cx3cr1	4.10159e-30	Grap	1.08358e-27	Ifitm2	2.16202e-20
64	Meis2	1.06595e-65	Tmsb10	1.31204e-67	Serf1	1.64169e-90	Scg5	1.24684e-58	Bhlhe22	3.85755e-72	Hnrnpa2b1	6.21067e-15	Cd24a	7.74997e-47	Cadm2	7.92688e-47	Wasf1	5.17685e-46	1810037I17Rik	6.7312e-140	S100a16	3.18209e-125	Snrpn	1.07696e-37	Ddx5	1.76568e-12	Sh3bgrl3	6.32686e-27	Sp8	2.42455e-18	Nfia	9.12459e-37	Cd9	3.4507e-21	Ell2	0.576156	Rplp2	1.71118e-40	Kif5c	3.21257e-08	Cenpf	3.42103e-38	Mt1	5.81928e-30	Slc39a8	1.11141e-27	Pdlim2	2.20308e-20
65	Ilf2	2.40618e-65	Rps26	1.3773e-66	Hmgcs1	1.7241e-89	Cited2	1.41519e-57	Lmo7	4.92216e-72	Basp1	1.0282e-14	Stmn3	4.21796e-45	Klf6	9.57002e-47	Ly6h	6.55912e-46	Qk	7.02107e-137	Scd2	4.5078e-125	Acot7	1.12874e-37	Ubb	3.08055e-12	Stmn4	9.05094e-27	Zeb2	3.66034e-18	Hmgn1	2.13067e-36	Col12a1	4.90323e-21	Cfap57	0.579848	Rpl10a	8.37078e-40	Tcf12	3.23819e-08	Psap	3.3031e-37	Irf8	5.90877e-30	Apold1	1.75543e-27	Gucy1a3	7.76513e-20
66	Nrp1	4.69501e-64	Neb	2.95884e-64	Marcksl1	2.17643e-89	Ilf2	2.32974e-57	Neo1	3.58928e-71	Kif5c	1.08428e-14	Clmp	4.3526e-44	Mn1	1.28493e-46	Scoc	8.78151e-46	Prc1	1.61305e-136	Prkcdbp	5.39943e-125	Syt5	1.39633e-37	Hmgb3	4.54033e-12	Tubb3	9.44617e-27	Evl	6.23334e-18	Tspan3	3.7347e-36	Cygb	1.81259e-20	Tfdp2	0.587056	Gm2a	1.54e-39	Cdc42ep3	3.57718e-08	Rbms1	3.41495e-37	Plek	6.09657e-30	Kank3	1.83575e-27	Sema6d	1.28228e-19
67	Stmn1	1.31748e-63	Tcf12	1.6517e-63	Foxp1	1.67854e-88	Kif21a	1.8993e-56	Sec11c	3.93657e-71	Tubb2b	2.59435e-14	Rbfox1	4.51436e-44	Auts2	4.82356e-46	Foxp1	1.01696e-45	Cdc20	2.45961e-136	Cd81	6.4158e-125	Fam19a1	3.21293e-37	Pbx3	5.54523e-12	Calm3	1.36974e-26	Hint1	6.32171e-18	Rps10	7.07772e-36	Rcor2	2.95121e-20	Urod	0.593237	Rgcc	7.7724e-39	Trim2	4.16454e-08	Gpc1	2.45785e-35	Snx5	1.4083e-29	Cyba	2.80361e-27	Epas1	1.38058e-19
68	Cct7	4.15069e-63	Cadm1	1.86402e-63	Tenm3	4.94558e-88	Negr1	5.21154e-56	Tmsb4x	5.47454e-70	Klhdc2	2.75572e-14	Ttc28	2.02226e-43	Flrt2	5.46168e-46	S100a10	3.21101e-45	Tacc3	5.48323e-136	E130114P18Rik	6.58525e-125	Gabra2	5.9243e-37	Tpt1	7.78546e-12	Hmgcs1	1.4305e-26	Gng2	1.97066e-17	Phgdh	7.55163e-36	Ddah2	5.20127e-20	E2f2	0.594379	Rps29	8.31492e-39	Chd3os	4.2033e-08	Fat3	5.80226e-35	Efhd2	1.41327e-29	Mpzl1	3.32079e-27	Ppib	1.90127e-19
69	Ppdpf	2.01872e-62	Arl4d	2.10404e-63	Gabra2	1.1321e-87	Nrn1	8.97885e-56	Pcsk1n	6.75632e-70	Akap9	5.5778e-14	Rplp1	3.42228e-43	mt-Nd2	5.7275e-46	Pcsk1n	3.72318e-45	Pttg1	9.76102e-134	Sfrp1	3.15202e-124	Wnt7b	6.78245e-37	Eif4a1	1.00595e-11	Lrfn5	1.87069e-26	2700060E02Rik	3.20282e-17	Myl12a	1.24568e-35	Apba2	5.83228e-20	Ctse	0.595258	Rps12	1.00613e-38	Slain1	4.55034e-08	Bin1	2.60201e-34	Fth1	4.67595e-29	Cd81	3.66817e-27	Agrn	3.7485e-19
70	H3f3b	1.61563e-59	Rps19	6.89206e-62	Calm1	1.38157e-87	Ptprs	1.59859e-55	Cadm1	1.81759e-69	Srrm4	5.8344e-14	Atpif1	7.59556e-42	Zeb2	1.36507e-45	Lingo1	3.89649e-45	Shfm1	8.57758e-133	Gstm1	5.9057e-123	Neo1	2.14719e-36	Pbx1	1.11227e-11	Usmg5	3.7613e-26	Ina	5.81784e-17	Rpl39	1.31328e-35	Bhlhe22	6.44008e-20	Rhag	0.595258	Rpl18	1.04772e-38	Hdgfrp3	4.97297e-08	Cryab	3.48596e-34	Rpl12	1.22704e-28	Bambi	7.81947e-27	Ppp1r14a	8.18613e-19
71	Ldhb	4.3744e-59	H3f3a	4.53226e-61	Ppia	2.67189e-87	Nnat	5.17811e-54	Fgf13	2.03701e-69	Igsf3	1.528e-13	Bcl11a	8.20592e-41	Plxna4	2.90131e-45	Lrfn5	9.22059e-45	Fam64a	3.07943e-132	Glo1	1.50821e-122	Nol4	4.72899e-36	Atp5b	1.12393e-11	Atpif1	5.64704e-26	RP23-291B1.2	1.04467e-16	Btg1	2.66748e-35	Cntnap5a	7.30314e-20	Epb42	0.595258	Kcnip3	5.2862e-38	Ogt	5.79451e-08	Prnp	4.51027e-34	Rps6	2.53697e-28	Lmo2	8.55846e-27	Tnfrsf21	8.3481e-19
72	Sox11	2.75477e-57	Fau	5.78871e-60	Stmn4	4.1331e-86	Son	3.83356e-53	Bcl11b	2.89482e-69	Satb2	2.25279e-13	Shtn1	8.64823e-41	Luzp2	4.67633e-45	Gng3	1.1149e-44	Nasp	2.25254e-130	Hmgb2	2.07626e-122	Bend6	7.66348e-36	Islr2	2.41926e-11	Dab1	2.1122e-25	Arx	1.58786e-15	Rpl36	1.35658e-34	Sema3c	8.63861e-20	Gm17275	0.624759	C1ql1	1.18007e-37	Stxbp1	6.08654e-08	Daam1	5.37367e-34	Rac2	2.72918e-28	Rrbp1	1.0555e-26	Gng5	8.63142e-19
73	Cttnbp2	2.39119e-55	Dpf1	1.82155e-59	Cck	1.33393e-85	Ezh2	3.22448e-52	Ina	2.42489e-68	Ppfia2	3.0333e-13	Cacna2d1	5.67804e-40	Ifngr2	6.25457e-45	Glra2	1.34053e-44	H2afy	2.47531e-130	Asrgl1	6.81071e-122	Crmp1	1.35463e-35	Ube2i	3.54017e-11	Cox6b1	2.28016e-25	Fjx1	2.67093e-15	Prdx6	4.23969e-34	Rps7	1.165e-19	S100a13	0.626322	Rps13	1.28554e-37	Slc32a1	6.23517e-08	Kcnip2	1.51594e-33	Rpl27a	1.22154e-27	Sptbn1	1.44321e-26	Cd248	8.88797e-19
74	Ddit4	2.39294e-55	Dynll2	5.22225e-56	Sybu	7.90162e-84	Atp6v0e	6.02325e-52	Lmo4	3.22158e-68	Plxna2	4.01288e-13	mt-Cytb	4.01253e-39	Khdrbs2	6.52665e-45	Prkce	9.92243e-44	Cenpe	6.20767e-128	Glud1	1.39319e-120	Itm2b	6.65382e-35	Hdac2	4.99689e-11	Ftl1	3.05182e-25	Dynll2	4.30173e-15	Pam	4.43221e-34	Ezr	1.57332e-19	Stom	0.634498	Rpl22	8.18599e-37	Cntn2	6.57351e-08	Edil3	1.67033e-33	Coro1a	1.38539e-27	Id3	1.62691e-26	Etfb	1.09585e-18
75	Zfp462	7.67203e-55	Chd3os	1.04798e-55	Mgst3	1.01812e-82	Ier5	1.87182e-51	Map1lc3a	4.82601e-68	Atp6v0e	8.00464e-13	Cetn3	6.03443e-39	mt-Nd1	2.38625e-44	Arhgap20	1.14942e-43	Mdk	1.09903e-126	Id4	3.88286e-120	Dpysl3	1.64073e-34	Chd3	6.1935e-11	Celf2	3.12966e-25	Ap2s1	4.95102e-15	Nedd4	6.28014e-34	Tcf4	2.83761e-19	Tspan32	0.658784	Nap1l5	1.01289e-36	Tenm2	6.77726e-08	5330417C22Rik	1.99045e-33	Ctsa	1.66842e-27	Tmem252	7.00801e-26	Lamc1	1.10531e-18
76	Clmp	1.01979e-54	Calm2	3.02826e-55	Sncb	1.4351e-82	Hdac2	2.7122e-51	Acp1	1.06694e-67	Gpm6b	1.34821e-12	Mllt11	1.01186e-38	Ptprt	4.09115e-44	Fabp3	1.32871e-43	Ckb	1.46109e-126	Rpl22l1	6.88482e-119	Zfp428	2.08304e-34	Jund	7.53249e-11	Mllt11	3.25297e-25	Sec61g	6.64873e-15	Hnrnpf	6.55469e-34	Carhsp1	3.81636e-19	Gadd45a	0.672789	Dll3	1.71067e-36	Atp1b1	8.51901e-08	Dkk3	2.40111e-33	Maf	4.63489e-27	Slc31a1	8.35955e-26	Lama4	1.33556e-18
77	Ube2e3	5.24885e-54	Cbfa2t3	5.37072e-55	Prr7	1.77725e-81	Gm3764	9.69751e-51	Zeb2	2.9027e-67	Ttc3	1.37309e-12	Tspan13	1.75893e-38	Sybu	2.1665e-43	Mgst3	5.31951e-43	Slc1a3	3.17705e-125	Rhoa	1.10854e-117	Sh3yl1	2.13591e-34	Tmem176b	1.09763e-10	mt-Atp6	1.51166e-24	Atp6v0b	9.10971e-15	Rpl6	3.42229e-33	Rerg	7.60471e-19	Hemgn	0.690318	Tpm1	1.97532e-36	Ptma	9.68096e-08	Mpc1	2.84026e-33	Rps23	4.73279e-27	Aplp2	1.71681e-25	F2r	1.55349e-18
78	Laptm4a	3.30445e-52	Gnas	2.92224e-53	Syt5	2.20457e-81	Hs3st1	4.59508e-50	Itsn1	7.83762e-66	Ptbp2	1.38312e-12	Ppia	2.19565e-38	Rplp1	5.17841e-43	Nop10	3.72269e-42	Ccnb2	4.0294e-125	Tspan3	4.54224e-115	Fabp5	5.65649e-34	Rgs2	1.30754e-10	Tmem158	1.76018e-24	Igf1	3.44704e-14	H2afy	2.14892e-32	Rnf182	8.63069e-19	C1qc	0.693091	Rps16	4.09896e-36	Chl1	1.10028e-07	Ndufb2	2.90145e-33	Cotl1	5.8994e-27	Rhob	3.21791e-25	Esam	2.14641e-18
79	Eif3k	2.0074e-51	Zfp428	4.4727e-53	Ptp4a1	1.56447e-80	Fus	6.50092e-50	Gng2	8.69933e-66	Jund	2.03359e-12	Pou3f2	7.97571e-38	Foxp1	2.21163e-42	Rgma	6.41833e-42	Prdx1	5.50189e-125	Serf2	9.84177e-115	Dynll1	9.90016e-34	Dlx6	1.88548e-10	Syt1	2.54765e-24	mt-Nd1	4.83849e-14	Rpl10a	3.58531e-32	Rbfox3	1.36881e-18	Cd36	0.696353	Rps24	5.47585e-36	Rph3a	1.15007e-07	Ramp1	1.43468e-32	Rps24	1.00499e-26	Ostf1	5.20891e-25	Lhfp	3.94884e-18
80	Cnr1	2.03125e-51	Cux2	1.18047e-52	Map1b	2.22581e-80	Cul1	2.14924e-49	Plppr1	2.13721e-65	Epha3	2.06209e-12	Nsg1	1.48971e-37	Snca	6.42552e-42	Phactr1	1.11238e-41	Lsm6	3.61328e-124	Gas1	3.10209e-114	Banp	1.49662e-33	Anp32a	2.04227e-10	Hecw1	4.09057e-24	Thoc7	5.3656e-14	Serpinh1	4.85616e-32	Cxxc5	2.2046e-18	Ermap	0.704929	H2afv	6.62647e-36	Cxx1a	1.23016e-07	Ndufa11	3.77975e-32	Rps25	1.05294e-26	Adgrf5	6.32658e-25	Fermt2	5.99717e-18
81	Nell2	1.99995e-50	Cirbp	4.03023e-51	Nfix	4.79311e-80	Ing4	5.70823e-49	Lpl	1.37168e-64	Tubb5	7.24992e-12	Dpysl2	2.49361e-37	Dlgap1	1.35341e-41	Ank3	2.58982e-41	Knstrn	3.75449e-124	Ndufc2	1.46183e-113	Ppp1r14c	1.62753e-33	Pafah1b3	2.26508e-10	Nr2f1	4.2258e-24	Gpx4	9.13458e-14	Mfap4	5.93133e-32	Pak7	1.21842e-17	Gch1	0.733217	Pcdh11x	6.6836e-36	Bcl11a	1.38673e-07	Mia	8.78914e-32	Gas6	1.38811e-26	Pfn1	7.15744e-25	Meg3	6.49808e-18
82	Tagln3	4.39098e-50	Snap25	2.50955e-50	Ptprd	7.37333e-80	Cnn3	7.66051e-49	Grin2b	1.48699e-64	Sf3b2	7.29968e-12	Ablim1	1.23823e-36	Clmp	2.37777e-41	Fam110b	2.73014e-41	Prdx4	1.05866e-123	Rlbp1	4.61234e-113	1110008P14Rik	2.91974e-33	Rpl23a	2.46554e-10	Nell2	4.84359e-24	Rgs16	1.55192e-13	Rps11	7.49888e-32	Prr7	1.30874e-17	Pip5k1b	0.744954	Rps14	1.06352e-35	Cdk5r1	1.43516e-07	Tnfrsf21	1.14711e-31	Lyz2	1.52397e-26	Htra3	7.21261e-25	Tm4sf1	9.0215e-18
83	Prmt1	4.43262e-50	Satb1	2.71741e-50	Map1lc3a	1.00474e-78	Eomes	1.23617e-48	Mtss1	2.91919e-64	Trim2	8.17902e-12	Eml1	1.77733e-36	Scn2a1	3.9382e-41	Mmd	3.43755e-41	Kif22	5.04723e-123	Scrg1	2.3927e-112	Guk1	5.54776e-33	Slain1	2.94864e-10	Camkv	1.25196e-23	Cox5b	2.15366e-13	Npm1	1.77971e-31	Ier2	4.74484e-17	Gm10112	0.748926	Cd81	1.54663e-35	Tmem35	1.49491e-07	Spock2	1.22102e-31	Serinc3	2.33261e-26	Gimap6	8.05206e-25	B2m	9.48274e-18
84	Gapdh	5.30793e-50	Ubash3b	1.0582e-49	Cfl1	4.70729e-78	Lrpap1	1.56887e-48	Banp	8.5353e-64	Ptov1	8.66965e-12	Cnih2	2.06503e-36	Gas7	3.15287e-40	Snrpn	4.19367e-41	Rrm1	1.80371e-119	Fjx1	1.62939e-111	Fdps	8.17915e-33	Rps4x	3.3918e-10	Hint1	2.07032e-23	Ckb	2.89526e-13	Btbd17	2.35726e-31	Flrt1	7.63189e-17	Zc3hav1	0.753165	Cdk2ap1	1.68661e-35	Plxna4	1.62879e-07	Dnmt3a	4.49935e-31	Sirpa	3.36277e-26	Itgb1	1.39636e-24	Cox8a	1.07924e-17
85	Hnrnpk	1.30504e-49	Spats2l	1.92273e-47	Hcfc1r1	6.7126e-78	Lrp8	2.09242e-48	Msra	5.64473e-63	Rbm39	1.13749e-11	Frmd4a	2.57301e-36	Lsamp	3.7758e-40	Kidins220	7.19756e-41	Usp1	5.61505e-119	Psat1	1.99492e-111	Stmn1	1.65611e-32	Tshz1	8.01177e-10	Tenm1	3.74852e-23	Zfp536	3.22375e-13	Gas1	2.56733e-31	Ly6e	1.43052e-16	Tspan33	0.760348	Gstm5	1.79025e-35	Frmd4a	1.7623e-07	Calm2	6.26108e-31	Itm2b	6.78103e-26	Cdkn1a	1.41961e-24	Ccdc12	2.16539e-17
86	Tnik	1.82402e-49	Rpl13	2.21628e-47	Arpc2	5.19252e-77	Ttc3	2.33624e-48	2900055J20Rik	6.93782e-63	Myt1l	1.24031e-11	Plxna4	8.7728e-36	Fam49b	3.81524e-40	1110008P14Rik	1.14354e-40	Ckap2l	1.47695e-118	Slc25a5	3.3927e-110	Ntf3	1.73644e-32	Nono	9.84201e-10	Calm2	4.12341e-23	Aes	4.08555e-13	Cdk6	5.09289e-31	Fezf2	2.5523e-16	Slc48a1	0.766909	Naca	3.70414e-35	Cacng3	1.84783e-07	Dach1	6.85501e-31	Gpx1	1.16274e-25	Wwtr1	2.00722e-24	Pdzd2	2.75682e-17
87	Rps5	2.26534e-49	Tceal6	6.61077e-47	1110008P14Rik	1.27207e-75	Map1lc3b	1.46758e-46	Mmd2	9.70478e-63	Fam84a	2.08214e-11	Tmem158	1.1982e-35	Cxxc4	2.5714e-39	Hs3st4	3.34675e-40	Tyms	1.59592e-118	Tmbim6	9.10001e-110	Ftl1	3.09742e-32	Snrpn	1.48306e-09	Fabp3	5.78203e-23	Sox2	5.68429e-13	Gpm6b	7.02761e-31	Ndufa4	3.9709e-16	1810058I24Rik	0.77094	Rps20	5.64205e-35	Sox4	2.00224e-07	2210013O21Rik	7.46449e-31	Sparc	1.81177e-25	Ttyh2	2.32336e-24	Arhgdib	3.35283e-17
88	Basp1	1.72096e-48	Calb1	5.9239e-45	2610001J05Rik	5.36391e-74	Npc2	3.55851e-46	Nrxn1	7.68803e-62	Atxn10	2.18912e-11	Ptprk	3.51892e-35	Hmgcr	3.31805e-39	Fam19a1	6.80956e-40	Ezh2	2.20071e-118	Nkain4	3.46282e-108	Acvr2a	3.37172e-32	Zfhx3	1.61084e-09	Tenm3	9.06625e-23	Ppia	7.20771e-13	Mfge8	1.75346e-30	Btg2	4.94903e-16	Asb17os	0.795595	Rpl9	1.07944e-34	Rbms3	2.1291e-07	Cxxc5	7.63246e-31	Sh3bgrl3	4.65213e-25	Slc38a3	3.80969e-24	Fam101a	5.67658e-17
89	Mpped1	9.25953e-48	Kif2a	6.2299e-45	Fth1	1.91948e-72	Mfap2	1.20014e-45	Edil3	1.94479e-61	Celf2	3.04299e-11	Gucy1b3	7.90576e-35	S100a10	8.18646e-39	Lmo3	1.83588e-39	Srsf3	2.45462e-118	Gm3764	2.34763e-107	Slc16a2	7.68913e-32	Ptov1	2.26407e-09	Epha5	9.38874e-23	2019-09-07	1.15271e-12	Shfm1	2.82713e-30	Ptx3	5.44471e-16	Gm10603	0.79561	Ccnd2	1.97525e-34	Gpm6a	2.17964e-07	Gng3	1.0923e-30	Cd81	5.01561e-25	S100a16	4.42626e-24	Gja4	6.56894e-17
90	Kif5c	1.42224e-47	Ndufv3	6.33632e-45	Tspan13	4.61915e-72	Nfia	1.59541e-44	Ier5	7.67552e-61	Lsamp	4.20135e-11	Rorb	8.83982e-34	Bok	2.57224e-38	Dpysl2	1.84916e-39	Rbm3	4.60119e-116	Npc2	1.45868e-106	Sobp	1.4642e-31	Hnrnpab	2.34244e-09	Arhgdig	1.04141e-22	Hnrnpk	1.18724e-12	Tfap2c	3.52986e-30	Lrp1b	1.04912e-15	Kcnj2	0.796695	Xylt1	4.40199e-34	Hsp90aa1	2.18812e-07	Cst3	2.68002e-30	Asah1	5.35665e-25	Ly6c1	5.29971e-24	Phlda1	9.04656e-17
91	Elavl3	6.65647e-46	Ndufa8	6.55619e-44	Crlf1	5.50267e-72	Cox7a2l	4.60725e-44	Mllt11	8.76377e-61	Bhlhe22	5.25406e-11	Serp2	1.2234e-33	Adgrl2	2.82577e-38	Chl1	2.55041e-39	Tk1	8.6646e-115	Slc1a2	1.61999e-106	Ttc9b	1.79272e-31	Shfm1	3.78755e-09	Ybx1	3.79506e-22	Cxx1a	1.40362e-12	Slc1a2	4.25372e-30	Zfpm2	2.52581e-15	Smim1	0.798512	Mfge8	1.02115e-33	Dock7	2.35092e-07	Angpt1	2.85426e-30	Erp29	6.78069e-25	Slc38a5	5.50317e-24	Ost4	9.07193e-17
92	Ubc	2.1509e-45	2700060E02Rik	7.42224e-44	Gucy1a3	1.13173e-71	Ypel3	6.43063e-44	Cnih2	1.20533e-60	Hnrnpa1	6.32338e-11	Srm	1.61533e-33	Kitl	4.99353e-38	Kif26a	6.09638e-39	Sox2	1.22714e-114	Lamp1	3.24573e-106	Flrt3	2.10049e-31	Nudt4	6.95103e-09	Shtn1	4.39044e-22	Pebp1	1.09155e-11	Gnai2	9.58696e-30	Prdm5	2.54444e-15	Cdkl1	0.800225	Rplp0	1.09297e-33	Elavl4	2.81521e-07	Gpi1	2.95975e-30	Unc93b1	1.11256e-24	Srgn	6.52829e-24	Lamb1	1.16953e-16
93	Smarcb1	3.31838e-45	Rpl19	1.24438e-43	Calm2	5.10908e-71	Cyth2	1.86302e-42	Olfm1	2.17195e-60	Selk	6.64277e-11	Ncam1	6.67413e-33	Myt1l	9.26023e-38	Ahi1	6.44574e-39	Nde1	9.99551e-114	Mdk	4.07783e-106	Igsf3	2.1684e-31	Dbn1	9.64469e-09	Tbca	8.41283e-22	Lurap1l	1.44856e-11	Clic1	1.24917e-29	Serping1	2.58797e-15	Gm6768	0.800738	B3gat2	1.36833e-33	Elavl2	3.08407e-07	Ina	3.69914e-30	Ostf1	3.56688e-24	Ablim1	1.84428e-23	Mprip	1.67635e-16
94	Frmd4b	8.38217e-45	Dgkg	2.33965e-43	Cd24a	9.68644e-71	Plcb1	6.8483e-42	Eif4a2	5.55592e-60	Mycl	6.67263e-11	Evl	7.31871e-33	Eif5a	1.25846e-37	Kctd12	1.58453e-38	Dtymk	4.48548e-113	Sparc	4.50951e-103	Tubb3	4.56579e-31	Syt6	1.06841e-08	Efnb2	9.8834e-22	Eif4a1	1.96422e-11	Rpl23	1.51029e-29	Auts2	2.76075e-15	Gm42749	0.805755	Rpl19	1.75071e-33	Evl	3.1662e-07	Baiap2	4.18999e-30	Cd52	5.04528e-24	Vim	2.68005e-23	Aldoa	2.11472e-16
95	Pcdh8	7.42285e-44	Cacng3	4.19551e-43	Cntn5	4.33896e-69	Pnrc1	1.61475e-41	Sox11	6.81366e-60	Itm2b	6.70864e-11	Lhfp	8.01992e-33	Cdkn1c	1.58736e-37	Nrcam	5.19215e-38	Cenpw	5.14181e-112	Id3	1.99212e-102	Ppia	5.72218e-31	Cnn3	1.2075e-08	2610001J05Rik	1.49981e-21	Grip1	3.42926e-11	Atp6v0e	1.9781e-29	Zfos1	2.96238e-15	Ttc39a	0.807025	2019-09-15	2.40547e-33	Luc7l3	3.3268e-07	Marcks	1.30514e-29	Rps27a	5.04597e-24	Igf1r	3.72274e-23	Mmp9	4.36157e-16
96	Jund	9.29166e-44	Cxx1a	4.47154e-43	Dpysl3	1.22196e-68	Emx1	5.78195e-41	Calb2	9.89596e-60	Tmsb4x	7.80482e-11	Polr1d	1.98143e-32	Nbl1	3.13655e-37	Map1b	6.18861e-38	Ube2s	1.54751e-111	Dhrs1	4.45232e-102	Lmo4	2.15739e-30	Tubb2b	1.3362e-08	Marcks	2.01729e-21	Cox6b1	4.71429e-11	Scp2	9.7267e-29	Coro2b	7.76986e-15	Aven	0.809704	Rps17	5.75627e-33	Hist3h2ba	3.67454e-07	Fjx1	2.30999e-29	Npl	5.42529e-24	H2-D1	4.01259e-23	Slc9a3r1	4.50599e-16
97	Fkbp4	8.06212e-42	Npy	4.80995e-43	Ntm	2.82739e-67	Hmgn1	4.83786e-40	Crip2	1.3725e-59	Dbn1	8.07683e-11	Tuba1a	3.02179e-32	Bend6	5.63073e-37	Nrgn	6.58712e-38	E130114P18Rik	2.48832e-110	Hmgcs1	1.23396e-101	Rell2	2.83176e-30	Slc32a1	1.53914e-08	Cd24a	3.38881e-21	Atp6v1g1	6.03393e-11	Sox2	1.60251e-28	Hpcal1	1.39195e-14	Fam120c	0.810219	Rps27	3.13108e-32	Hivep3	3.84196e-07	Hint1	7.52302e-29	Cd68	6.35284e-24	Emcn	5.31053e-23	Itgb1	4.89855e-16
98	Tkt	1.68205e-41	Gria4	5.58002e-43	Spint2	6.53954e-67	Islr2	1.6132e-39	Rnd2	1.58477e-59	Ip6k2	1.15348e-10	Usmg5	8.53913e-32	Cplx1	6.83494e-37	Shtn1	8.82014e-38	Esco2	7.60537e-110	Rcn1	3.13958e-101	Hpca	4.984e-30	Igfbpl1	1.55173e-08	Klf6	3.93212e-21	Nr2f1	6.43437e-11	Ckb	4.56251e-28	Rpl7	4.98509e-14	Npb	0.81193	Atp5g2	4.5038e-32	Ube3a	3.88778e-07	Unc119	8.32969e-29	Olfml3	8.34472e-24	Arhgap29	6.67565e-23	Epb41l2	5.98604e-16
99	Aprt	2.96509e-40	Cox8a	1.49054e-42	Plxna4	1.12119e-66	Ube2b	1.78517e-39	Stmn3	3.89719e-59	Mdk	1.39061e-10	Akap9	8.97714e-32	Lhfp	1.16141e-36	Igfbp3	1.335e-37	Rhoa	3.3093e-109	Ctsl	3.40023e-101	AI413582	5.13272e-30	Rbm39	2.94403e-08	Edil3	4.99407e-21	Ngfrap1	6.64339e-11	Dmrta2	1.01529e-27	Ank3	5.65621e-14	Gm38287	0.812127	Sox6	5.53012e-32	Gm17750	4.40648e-07	Syndig1l	2.24321e-28	Rpl41	1.95496e-23	Ets1	8.92873e-23	S1pr3	6.41362e-16
