# Supplementary material for: Maf and Mafb control mouse pallial interneuron fate and maturation through neuropsychiatric disease gene regulation
Source: eLife journal article supplement (doi:10.7554/elife.54903), 2020-05-26
Supplement: supp [file elife-54903-supp-v1.zip › elife_poa_e54903_Figure_3_figure_supplement_1.pdf]

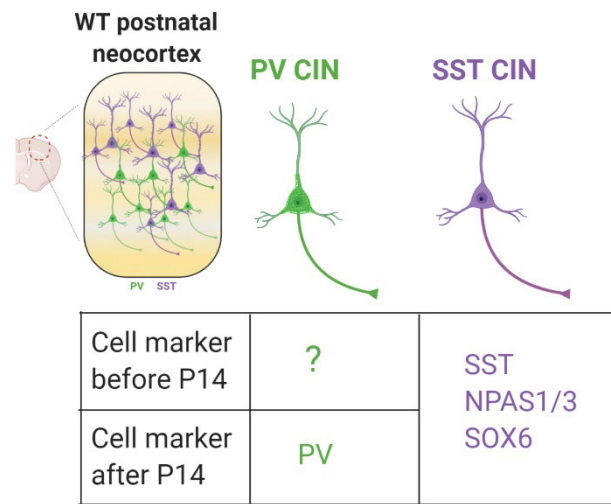

**Existing Knowledge:**

*Sst-IRES-Cre* labels the majority of the SST CINs; very few CINs in the *Sst-IRES-Cre* lineage express PV in adulthood.

**Hypothesis:**

In the immature neocortex (before PV expression begins at ~14 days), *Nkx2.1-Cre* lineage CINs that are SST negative have high a likelihood to become PV CINs

**Figure 3 – figure supplement 1. Schema depicting the hypothesis behind candidate PV IN marker discovery**

In Pai et al., 2019, we fate-mapped the *Sst-IRES-Cre* lineage and discovered that >90% of *Sst-IRES-Cre* labeled CINs remain to be SST-expressing in adulthood. Very few *Sst-IRES-Cre* CINs become PV-expressing. We hypothesize that the MGE-derived immature CINs that are SST-negative have a high likelihood to become PV CINs.
