# Supplementary material for: Maf and Mafb control mouse pallial interneuron fate and maturation through neuropsychiatric disease gene regulation
Source: eLife journal article supplement (doi:10.7554/elife.54903), 2020-05-26
Supplement: supp [file elife-54903-supp-v1.zip › elife_poa_e54903_Figure_3_figure_supplement_2.pdf]

*tdTomato - Somatostatin*

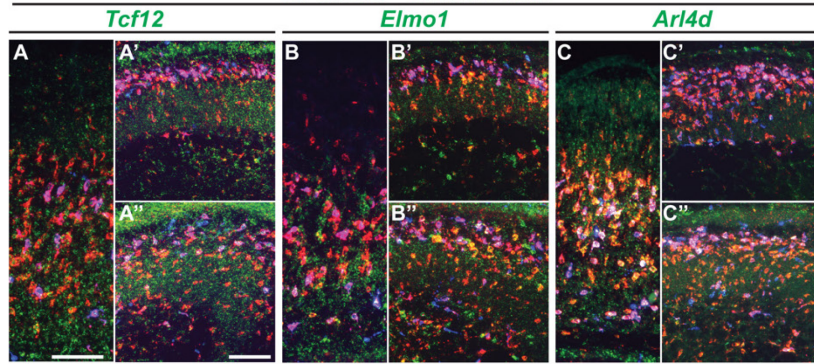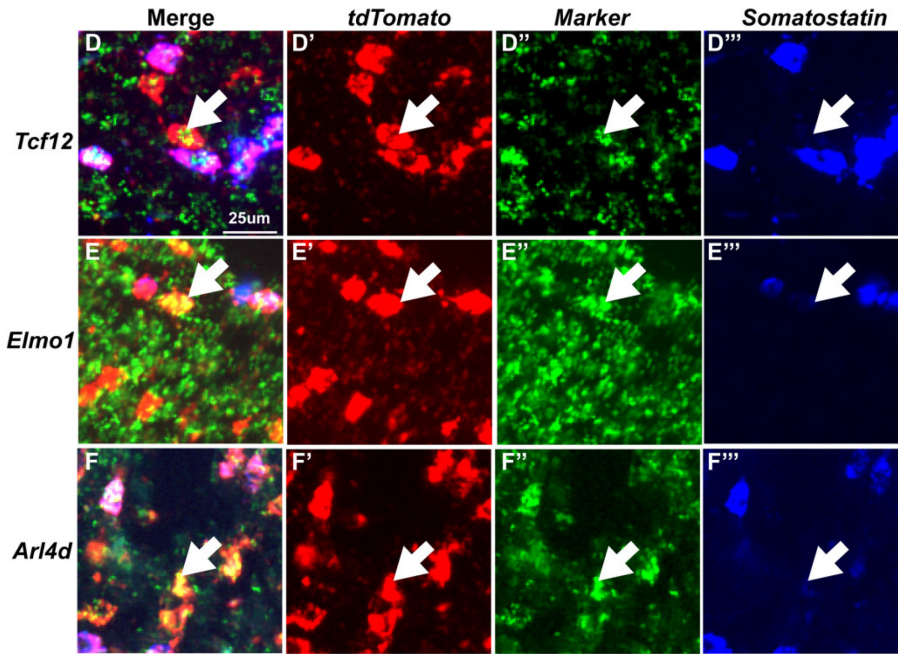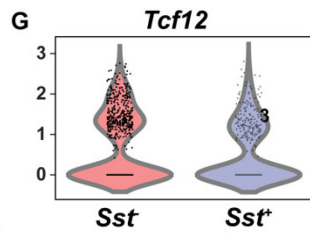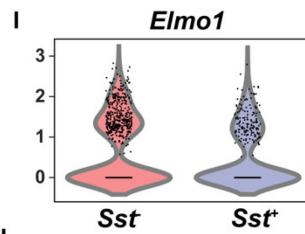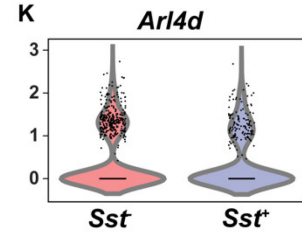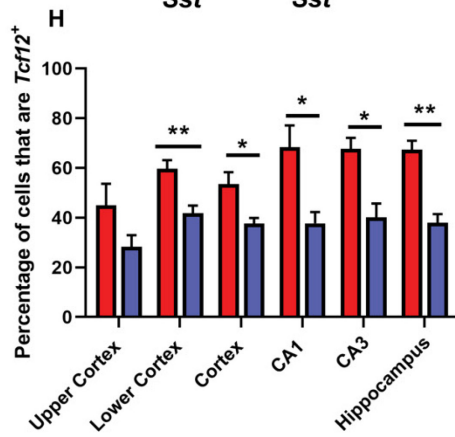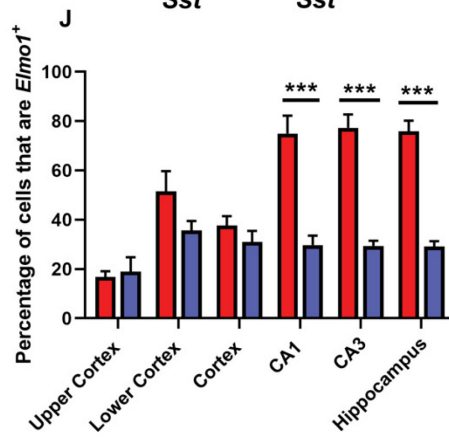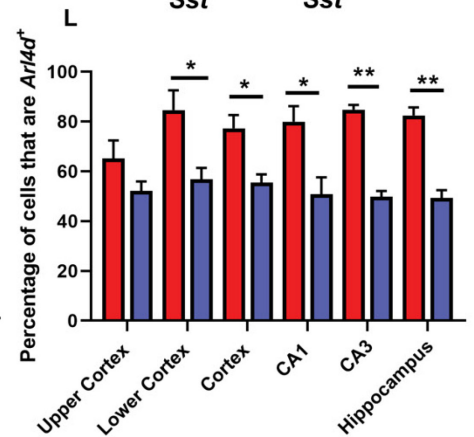

■ *tdTomato*<sup>+</sup>; Marker<sup>+</sup> ■ *tdTomato*<sup>+</sup>; Somatostatin<sup>+</sup>

**Figure 3 – figure supplement 2. Multiplex RNA *in situ* hybridization validation of proposed immature PV IN markers**

(A-C'') Lower magnification fluorescent images of multiplex RNA *in situ* hybridization for *Tcf12*(A-A''), *Elmo1*(B-B'') and *Arl4d*(C-C''). (D-F'') Higher magnification fluorescent images of multiplex RNA *in situ* hybridization for *Tcf12*(D-D''), *Elmo1* (E-E'') and *Arl4d* (F-F''). White arrows point to INs that are marker (*Tcf12*, *Elmo1* or *Arl4d*) and *tdTomato* positive but *Sst* negative. Violin plots showing the normalized expression value (Y-axis) of each cell analyzed in each group for *Tcf12*(G), *Elmo1*(I) and *Arl4d*(K). Quantification of the percentage of *tdTomato*<sup>+</sup>; *Sst*<sup>-</sup> and *tdTomato*<sup>+</sup>; *Sst*<sup>+</sup> INs in the neocortex and in the hippocampus that are either *Tcf12*<sup>+</sup>(H), *Elmo1*<sup>+</sup>(J) or *Arl4d*<sup>+</sup>(L). Scale bar in (A)=100um, (A'')=200um and (D)=25um. 2 WTs and multiple brain sections per animal were used for quantification. For statistical analysis, multiple independent t-tests without same standard deviation assumption were conducted to compare the expression of each gene in each brain region. \*p<0.05, \*\*p<0.01, \*\*\*p<0.001
