# Supplementary material for: Maf and Mafb control mouse pallial interneuron fate and maturation through neuropsychiatric disease gene regulation
Source: eLife journal article supplement (doi:10.7554/elife.54903), 2020-05-26
Supplement: supp [file elife-54903-supp-v1.zip › elife_poa_e54903_Figure_3_figure_supplement_3.pdf]

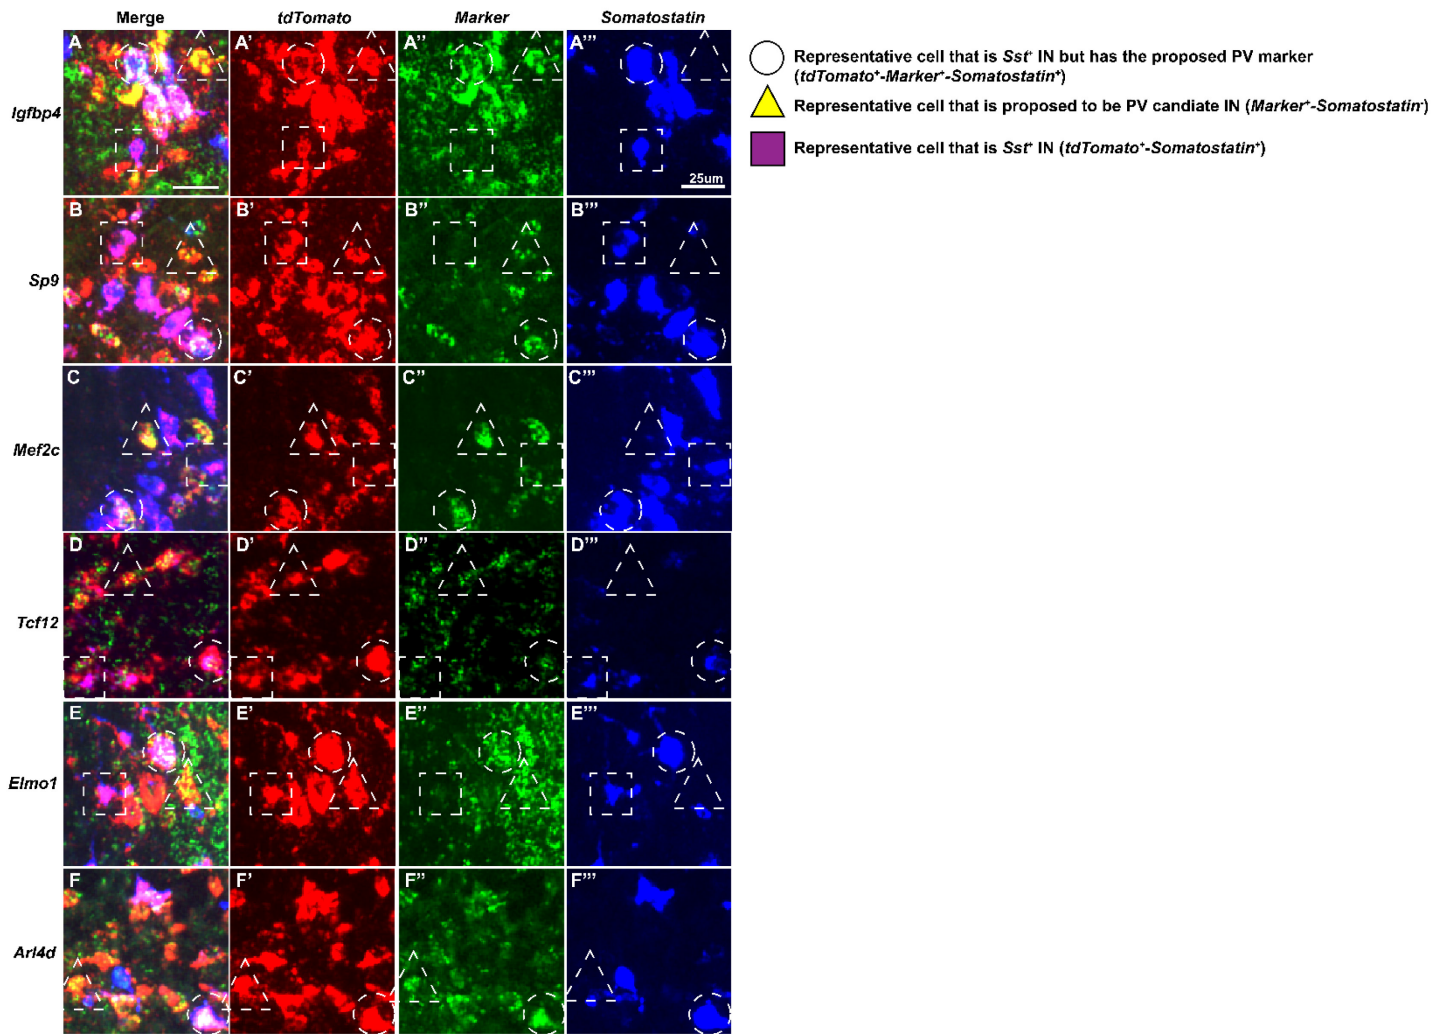

**Figure 3 – figure supplement 3. Higher magnification view of HINs from multiplex fluorescent *in situ* hybridization**

Higher magnification of HINs that are marker positive [*Igfbp4*(A-A'''), *Sp9*(B-B'''), *Mef2c*(C-C'''), *Tcf12*(D-D'''), *Elmo1*(E-E''') and *Arl4d*(F-F''')] that are either in the *Sst*-lineage or in the proposed immature PV-lineage. Circle: representative cell that is *Sst*<sup>+</sup> IN but has the proposed PV marker; Triangle: representative cell that is proposed to be PV candidate IN; Square: representative cell that is *Sst*<sup>+</sup> IN. Scale bar in (A)=25µm.
