# Supplementary material for: Maf and Mafb control mouse pallial interneuron fate and maturation through neuropsychiatric disease gene regulation
Source: eLife journal article supplement (doi:10.7554/elife.54903), 2020-05-26
Supplement: supp [file elife-54903-supp-v1.zip › elife_poa_e54903_Figure_4_figure_supplement_1.pdf]

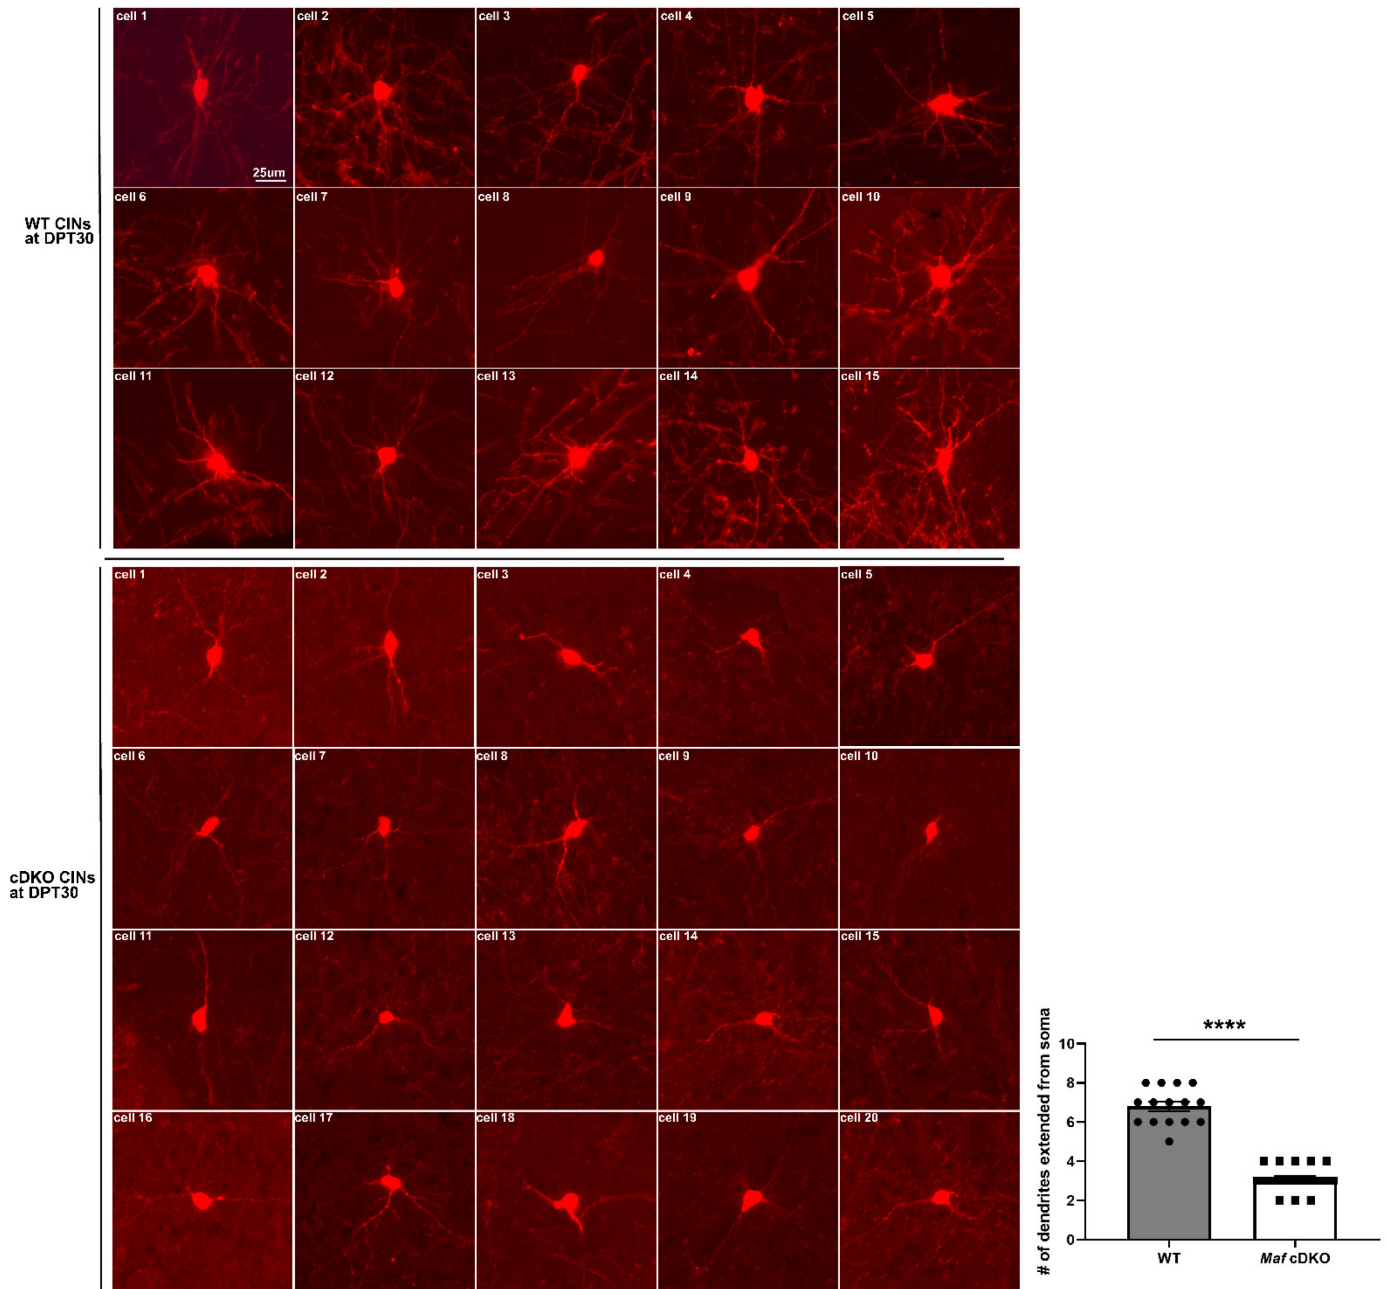

**Figure 4 – figure supplement 1. Individual CINs from transplanted WT and *Maf* cDKO MGE cells grown in vivo for 30 days**

Here we provide a collection of single cell images from the transplant experiment. Top 3 rows show WT CINs that developed in a WT neocortex *in vivo* for 30 days, while the bottom 4 rows show *Maf* cDKO CINs that developed in a WT neocortex *in vivo* for 30 days. We quantified the number of dendrites extending from the soma in each genotype, and used unpaired t-test to conduct statistical comparison. The data suggest that *Maf* cDKO CINs have decreased neurite numbers, which is consistent with our *in vitro* finding (Figure 4). Each data point represents 1 cells. \*\*\*\* $p < 0.0001$ . WT: 15 cells from 3 animals; *Maf* cDKO: 20 cells from 3 animals.
