# Supplementary material for: Maf and Mafb control mouse pallial interneuron fate and maturation through neuropsychiatric disease gene regulation
Source: eLife journal article supplement (doi:10.7554/elife.54903), 2020-05-26
Supplement: supp [file elife-54903-supp-v1.zip › elife_poa_e54903_Figure_4_figure_supplement_2.pdf]

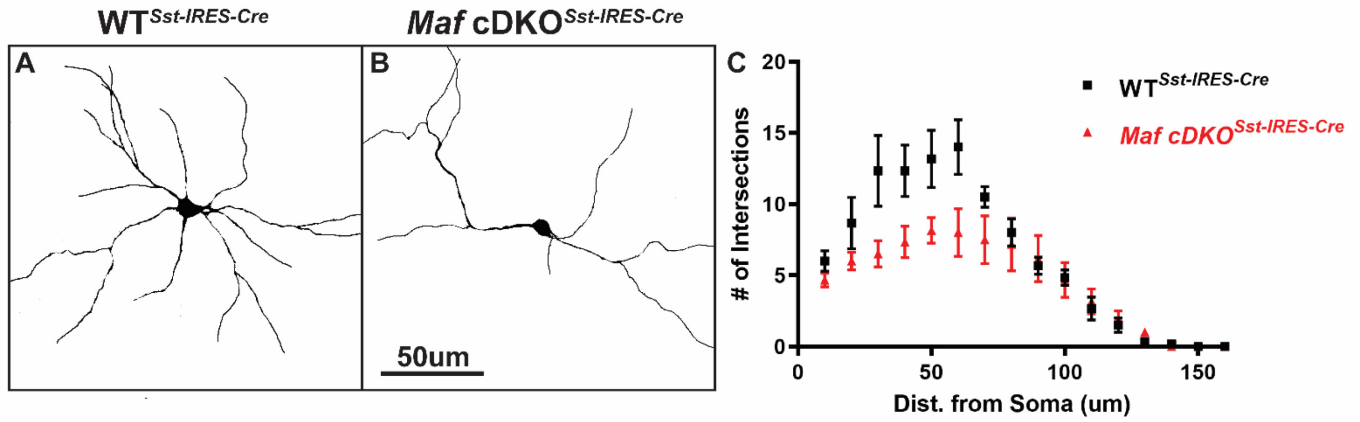

**Figure 4 – figure supplement 2. *Maf* cDKO *Sst-IRES-Cre* showed defects in neurite outgrowth**

We used *in vitro* culture assay to test *Mafb* and *c-Maf*'s post-mitotic function on neurite outgrowth. Briefly, P0 *Sst-IRES-Cre* generated WT and *Maf* cDKO neocortical tissues were dissociated (INs were labeled with *Cre*-dependent tdTomato expression) and diluted 5-fold with reporter negative dissociated P0 WT neocortical tissues before plating on culture slides. Cells were let grow for 14 days *in vitro* before analysis. (A-B) Representative traces of cultured WT *Sst-IRES-Cre* and cDKO *Sst-IRES-Cre* INs. (C) Sholl analysis suggested that *Maf* cDKO *Sst-IRES-Cre* INs have less complex neurite growing pattern, suggesting *Maf*'s roles in the post-mitotic stage for IN morphogenesis. N=3 for both groups. 6-8 neurons per group were used for quantification. Scale bar in (B) = 50  $\mu$ m.
