# Supplementary material for: Maf and Mafb control mouse pallial interneuron fate and maturation through neuropsychiatric disease gene regulation
Source: eLife journal article supplement (doi:10.7554/elife.54903), 2020-05-26
Supplement: supp [file elife-54903-supp-v1.zip › elife_poa_e54903_Figure_5_figure_supplement_1.pdf]

A

|             |                                   | WT (cells/mm <sup>2</sup> ) | <i>Maf</i> cDKO (cells/mm <sup>2</sup> ) |
|-------------|-----------------------------------|-----------------------------|------------------------------------------|
| Cortex      | <i>Pnoc</i> <sup>+</sup>          | 80.17 ± 10.35               | 173.62 ± 25.37**                         |
|             | <i>Pnoc-tdTomato</i> <sup>+</sup> | 23.65 ± 3.13                | 80.88 ± 9.98****                         |
| dmCortex    | <i>Pnoc</i> <sup>+</sup>          | 44.03 ± 8.52                | 341.84 ± 38.08****                       |
|             | <i>Pnoc-tdTomato</i> <sup>+</sup> | 19.17 ± 3.59                | 186.70 ± 20.58****                       |
| Hippocampus | <i>Pnoc</i> <sup>+</sup>          | 765.51 ± 67.20              | 1241.42 ± 73.20**                        |
|             | <i>Pnoc-tdTomato</i> <sup>+</sup> | 295.41 ± 25.44              | 724.58 ± 47.78****                       |
| CA1         | <i>Pnoc</i> <sup>+</sup>          | 646.06 ± 67.43              | 939.43 ± 91.05*                          |
|             | <i>Pnoc-tdTomato</i> <sup>+</sup> | 200.92 ± 42.28              | 518.50 ± 45.29***                        |
|             | <i>Pnoc-Htr3a</i> <sup>+</sup>    | 44.74 ± 8.74                | 50.62 ± 5.55                             |
| CA3         | <i>Pnoc</i> <sup>+</sup>          | 671.60 ± 48.86              | 1327.51 ± 46.62****                      |
|             | <i>Pnoc-tdTomato</i> <sup>+</sup> | 298.53 ± 19.63              | 848.62 ± 49.45****                       |
|             | <i>Pnoc-Htr3a</i> <sup>+</sup>    | 55.15 ± 3.19                | 50.44 ± 7.47                             |
| DG          | <i>Pnoc</i> <sup>+</sup>          | 989.45 ± 85.01              | 1570.45 ± 111.25**                       |
|             | <i>Pnoc-tdTomato</i> <sup>+</sup> | 401.58 ± 21.69              | 881.10 ± 76.07***                        |
|             | <i>Pnoc-Htr3a</i> <sup>+</sup>    | 28.65 ± 7.55                | 49.90 ± 4.13                             |

B

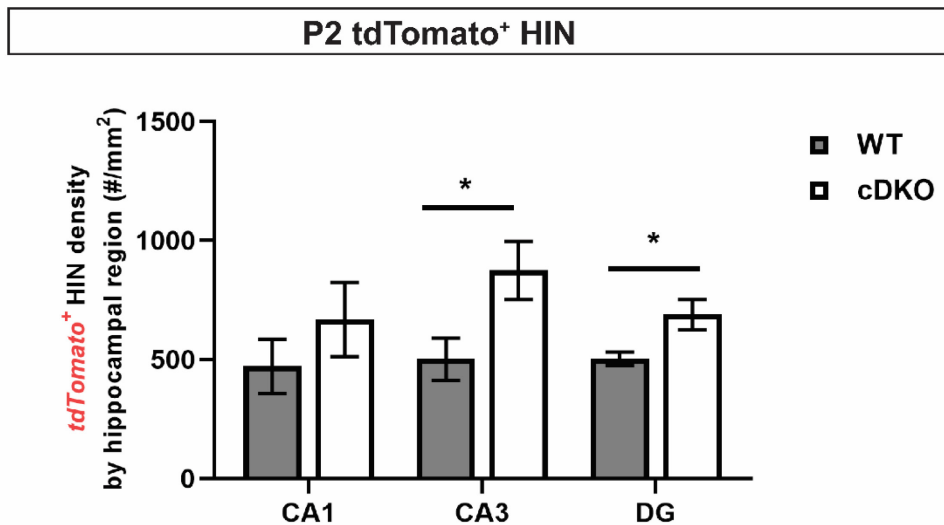

**Figure 5 – figure supplement 1. Quantification of *Pnoc*<sup>+</sup> INs by region and by IN subgroups/ Quantification of tdTomato<sup>+</sup> HINs by hippocampal region**

(A) Quantification of *Pnoc*<sup>+</sup> INs (cell density ± standard error) in the P2 neocortex and hippocampus by genotypes, and by IN subtypes. MGE origin: *tdTomato*-*Pnoc*<sup>+</sup> INs; CGE origin: *tdTomato*-*Htr3a*<sup>+</sup> INs. (B) Quantification of tdTomato<sup>+</sup> HIN density by hippocampal regions. Unpaired t-test; \*p<0.05, \*\*p<0.01, \*\*\*p<0.0001, \*\*\*\*p<0.00001
