# Supplementary material for: Maf and Mafb control mouse pallial interneuron fate and maturation through neuropsychiatric disease gene regulation
Source: eLife journal article supplement (doi:10.7554/elife.54903), 2020-05-26
Supplement: supp [file elife-54903-supp-v1.zip › elife_poa_e54903_Figure_6_figure_supplement_1.pdf]

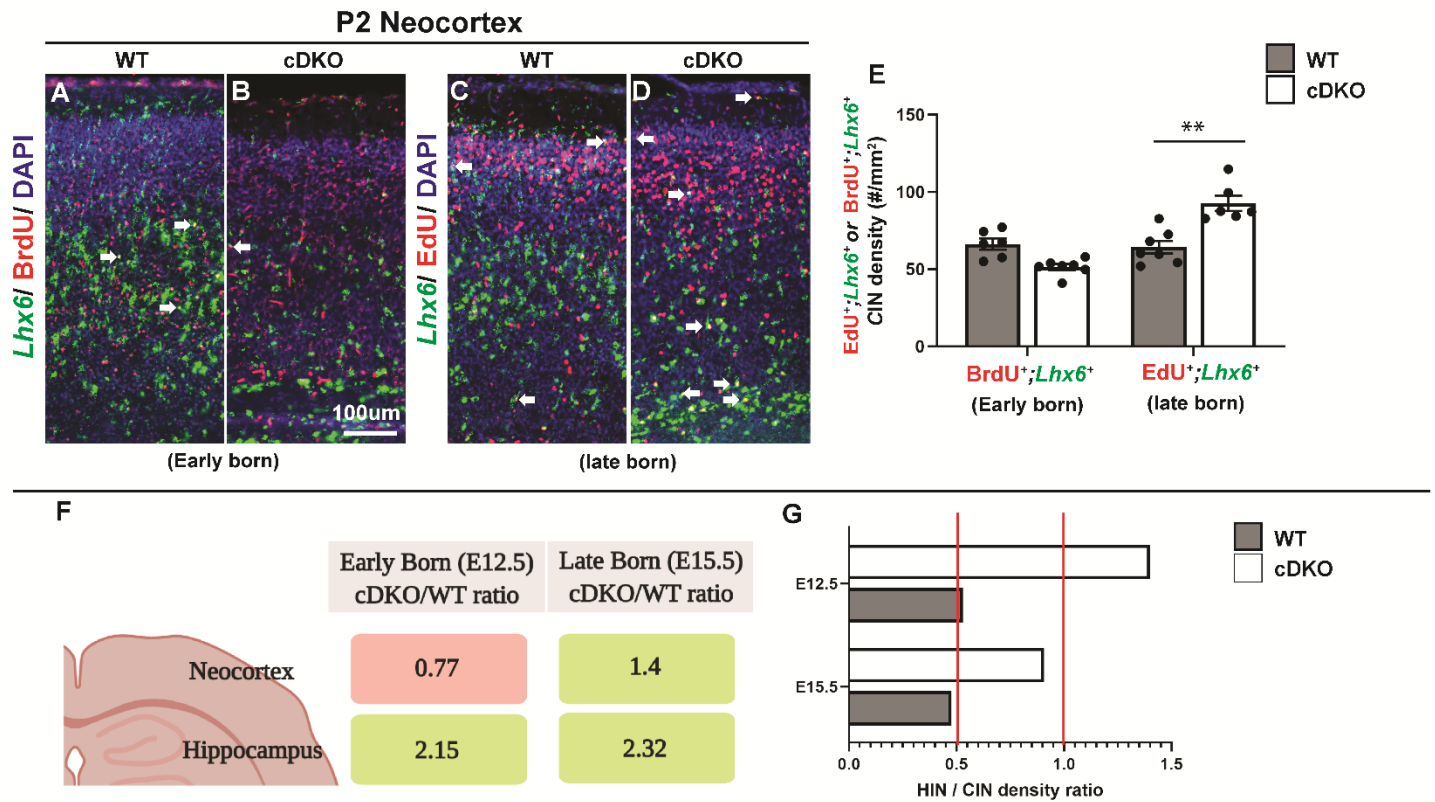

**Figure 6 – figure supplement 1. Analysis of early-born and late-born MGE-derived CINs in WT and *Maf* cDKO**

(A-D) *Lhx6* FISH with BrdU (A-B, early-born) or EdU (C-D, late-born) co-labeling on P2 WT and cDKO neocortex. (E) Quantification of the *Lhx6*<sup>+</sup>; BrdU<sup>+</sup> or *Lhx6*<sup>+</sup>; EdU<sup>+</sup> IN cell density in the neocortex. (F) Quantification of the early-born and late-born IN density (cDKO/ WT) in the neocortex and in the hippocampus. (G) Quantification of the early-born and late-born HIN to CIN density ratio by genotypes. Scale bar in (B) = 100um. N=3-4 per groups. \*\*p<0.01; Welch's t test.
