# Supplementary figures and images for: Maf and Mafb control mouse pallial interneuron fate and maturation through neuropsychiatric disease gene regulation
Source: eLife journal article supplement (doi:10.7554/elife.54903), 2020-05-26

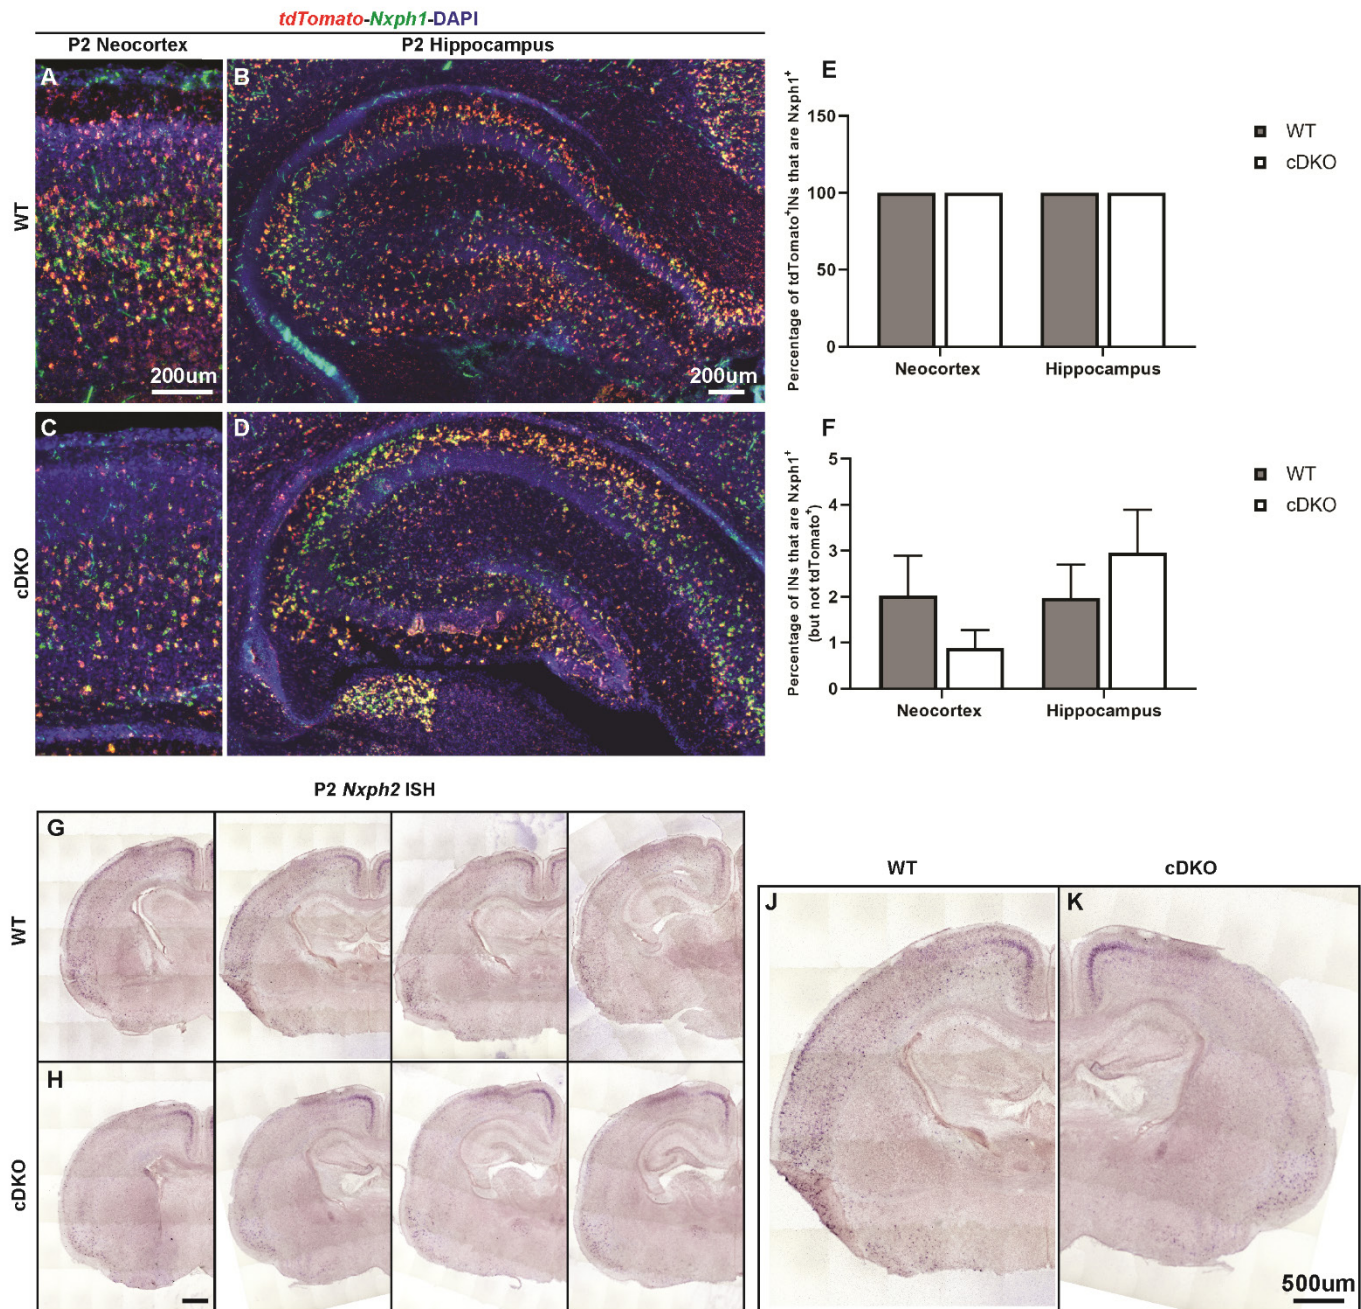

Supplement: supp [file elife-54903-supp-v1.zip › elife_poa_e54903_Figure_1_figure_supplement_4.pdf]

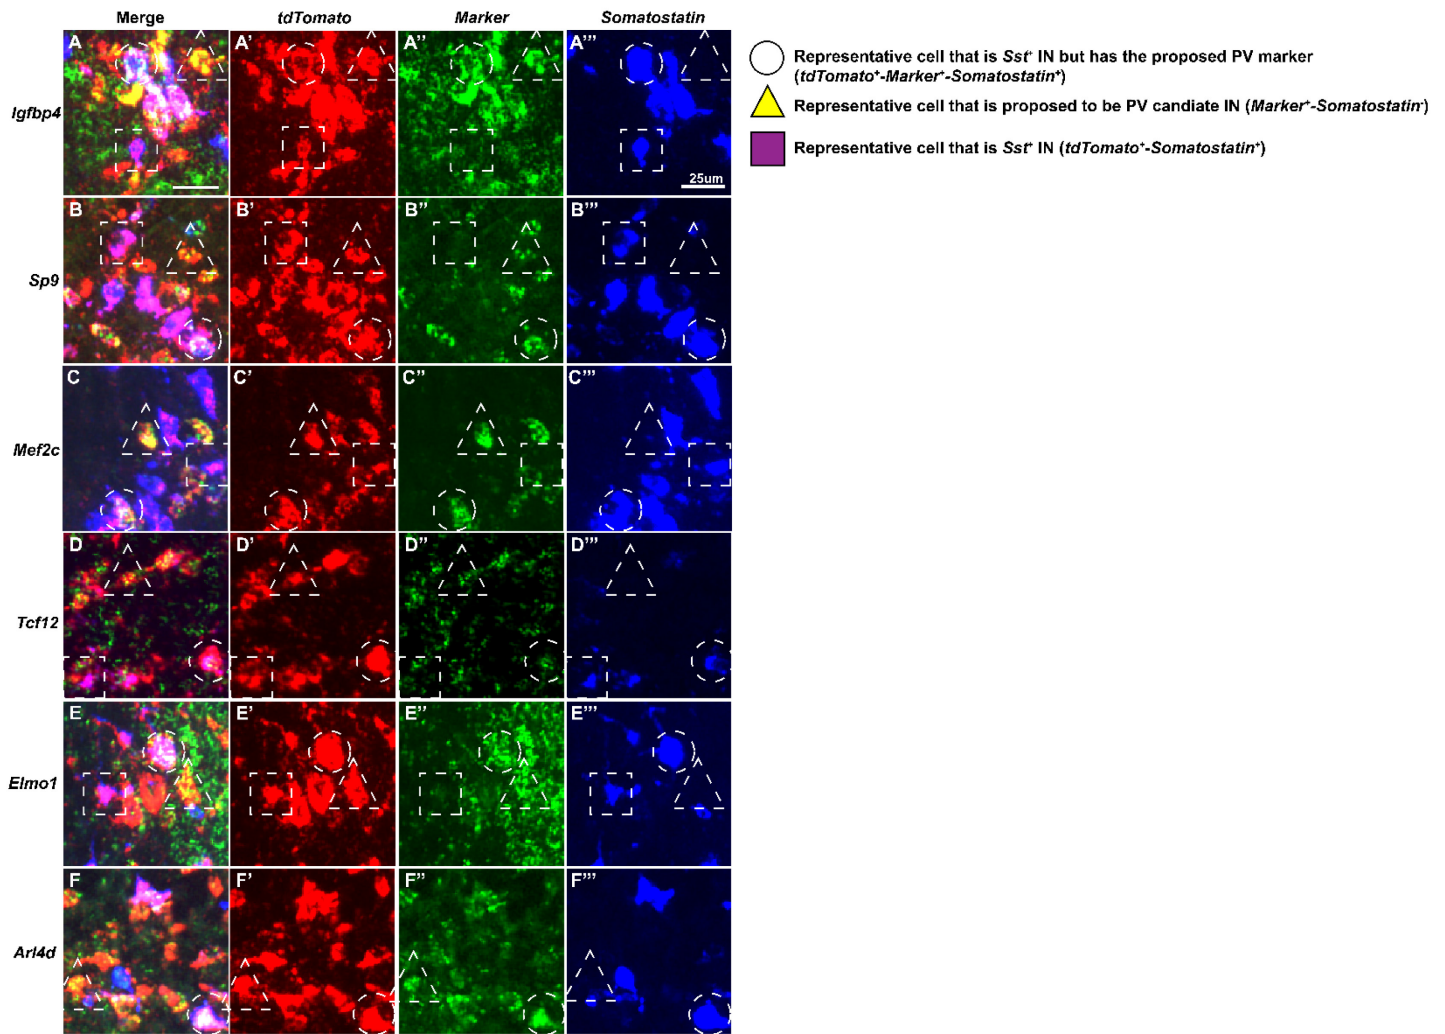

Supplement: supp [file elife_poa_e54903_Figure_3_figure_supplement_3.pdf › elife_poa_e54903_Figure_3_figure_supplement_3.pdf]
